# Supplementary material for: Genomic mutation features identify distinct BRCA-associated mutation characteristics in endometrioid carcinoma and endometrioid ovarian carcinoma
Source: Aging (Albany NY). 2021 Nov 27;13(22):24686–709. doi: 10.18632/aging.203710 (PMC8660599; doi:10.18632/aging.203710)
Supplement: Supplementary Table 1 [file aging-13-203710-s002.xlsx]

## Sheet: Sheet1
Supplementary Table 1. Sample information on endometrioid ovarian carcinoma from COSMIC.
Gene name	Mutated samples	Samples tested
CTNNB1	107	392
CTNNB1_ENST00000642886	103	392
CTNNB1_ENST00000453024	103	392
CTNNB1_ENST00000433400	103	392
CTNNB1_ENST00000643031	103	392
CTNNB1_ENST00000405570	103	392
CTNNB1_ENST00000643992	103	392
CTNNB1_ENST00000646174	103	392
CTNNB1_ENST00000431914	103	392
CTNNB1_ENST00000646369	103	392
CTNNB1_ENST00000644138	103	392
CTNNB1_ENST00000642992	103	392
CTNNB1_ENST00000644867	103	392
CTNNB1_ENST00000642426	103	392
CTNNB1_ENST00000645493	103	392
CTNNB1_ENST00000349496	103	392
CTNNB1_ENST00000643297	103	392
CTNNB1_ENST00000646725	103	392
CTNNB1_ENST00000642836	103	392
CTNNB1_ENST00000642986	103	392
CTNNB1_ENST00000645276	103	392
CTNNB1_ENST00000643541	103	392
CTNNB1_ENST00000396183	103	392
CTNNB1_ENST00000396185	103	392
CTNNB1_ENST00000645900	103	392
CTNNB1_ENST00000645982	103	392
CTNNB1_ENST00000644678	103	392
CTNNB1_ENST00000645210	103	392
CTNNB1_ENST00000643977	103	392
CTNNB1_ENST00000450969	103	392
CTNNB1_ENST00000646116	103	392
CTNNB1_ENST00000644524	103	392
CTNNB1_ENST00000646381	103	392
CTNNB1_ENST00000642248	103	392
CTNNB1_ENST00000644873	103	392
CTNNB1_ENST00000642315	103	392
CTNNB1_ENST00000647390	103	392
CTNNB1_ENST00000441708	103	392
CTNNB1_ENST00000647264	103	392
TP53	94	183
TP53_ENST00000455263	79	183
TP53_ENST00000445888	79	183
TP53_ENST00000617185	79	183
TP53_ENST00000620739	79	183
TP53_ENST00000615910	79	183
TP53_ENST00000413465	79	183
TP53_ENST00000359597	79	183
TP53_ENST00000610292	79	183
TP53_ENST00000610538	79	183
TP53_ENST00000619485	79	183
TP53_ENST00000622645	79	183
TP53_ENST00000420246	79	183
TP53_ENST00000619186	76	180
TP53_ENST00000504937	76	180
TP53_ENST00000510385	76	180
TP53_ENST00000504290	76	180
TP53_ENST00000610623	76	180
TP53_ENST00000618944	76	180
KRAS_ENST00000311936	63	443
PIK3CA_ENST00000643187	47	321
PIK3CA	47	321
KRAS	44	443
KRAS_ENST00000557334	44	443
KRAS_ENST00000556131	44	443
POLE	41	227
POLE_ENST00000535270	41	227
PTEN	40	218
ARID1A	19	75
ARID1A_ENST00000430799	14	75
ARID1A_ENST00000457599	14	75
ARID1A_ENST00000374152	11	75
PPP2R1A	11	170
PPP2R1A_ENST00000462990	11	170
BRAF	9	304
BRAF_ENST00000644969	8	304
BRAF_ENST00000288602	8	304
BRAF_ENST00000496384	8	304
APC	7	73
BRCA1_ENST00000491747	6	65
BRCA1_ENST00000586385	6	65
APC_ENST00000508376	6	73
BRCA1	6	65
BRCA1_ENST00000352993	6	65
BRCA1_ENST00000468300	6	65
ARID1A_ENST00000615191	6	71
BRIP1	6	16
ATM_ENST00000452508	6	37
FBXW7	6	86
BRCA1_ENST00000591534	6	65
ATR	6	18
CDKN2A_ENST00000304494	6	86
BRCA1_ENST00000493795	6	65
BRCA1_ENST00000591849	6	65
ATM	6	37
BRCA1_ENST00000357654	6	65
BRCA1_ENST00000354071	5	65
BRCA2	5	27
BRCA2_ENST00000544455	5	27
BRIP1_ENST00000577598	4	14
CDKN2A_ENST00000530628	4	86
ATM_ENST00000530958	4	37
ATM_ENST00000639240	4	37
ATM_ENST00000639953	4	37
ATM_ENST00000640388	4	37
ATM_ENST00000526567	4	37
CDKN2A_ENST00000494262	4	86
PIK3R1	4	36
CDKN2A_ENST00000579755	4	86
CDKN2A_ENST00000498628	4	86
CDKN2A	4	86
CDKN2A_ENST00000579122	4	86
FBXW7_ENST00000296555	3	86
FBXW7_ENST00000281708	3	86
FBXW7_ENST00000603841	3	86
SPOP	3	29
FBXW7_ENST00000263981	3	86
FBXW7_ENST00000393956	3	86
FGFR2_ENST00000358487	3	104
AKT1_ENST00000402615	2	42
NRAS	2	41
CDKN2A_ENST00000479692	2	84
AC012476.1	2	3
EMSY_ENST00000533248	2	9
ERBB2	2	74
CDKN2A_ENST00000497750	2	84
EMSY_ENST00000334736	2	9
AKT2	2	25
AKT2_ENST00000424901	2	25
RAD51_ENST00000267868	2	16
DROSHA_ENST00000513349	2	9
EMSY_ENST00000524490	2	9
DROSHA_ENST00000442743	2	9
AKT1_ENST00000407796	2	42
AKT1	2	42
DROSHA	2	9
AKT1_ENST00000555528	2	42
CDKN2A_ENST00000578845	2	84
DROSHA_ENST00000344624	2	9
AKT2_ENST00000311278	2	25
PIK3R1_ENST00000521657	2	36
PIK3R1_ENST00000523872	2	36
MTOR	2	18
AKT1_ENST00000554848	2	42
EMSY_ENST00000525919	2	9
EMSY	2	9
EMSY_ENST00000525038	2	9
EMSY_ENST00000529032	2	9
PIK3R1_ENST00000336483	2	36
AKT1_ENST00000349310	2	42
RB1	2	34
AKT2_ENST00000579047	2	25
PIK3R1_ENST00000320694	2	36
REXO4_ENST00000371935	1	1
SMARCAL1	1	1
LRRC7_ENST00000310961	1	1
VPS13C_ENST00000261517	1	1
CACNA1F_ENST00000323022	1	1
CENPBD1	1	1
SENP7	1	1
NPHP1	1	1
TLR4_ENST00000394487	1	9
USP11	1	1
SYTL2	1	1
MAN1C1_ENST00000263979	1	1
TVP23A	1	1
SYTL2_ENST00000524452	1	1
NUDT18	1	1
IGSF9	1	1
PHF2_ENST00000610682	1	1
FAN1_ENST00000565466	1	1
CNNM1	1	1
ESR1_ENST00000406599	1	8
HOPX_ENST00000556376	1	1
CRYBG3	1	1
ABI2	1	1
SLC26A11_ENST00000546047	1	1
KNDC1_ENST00000368571	1	1
PCDHGA5	1	1
MAPKAPK3	1	3
PCDHA6_ENST00000527624	1	1
CAPN15	1	1
PAX5_ENST00000446742	1	8
LRPPRC	1	1
LZTS3_ENST00000337576	1	1
LZTS3_ENST00000645462	1	1
FUT2	1	1
GRM7_ENST00000486284	1	1
RBM27	1	1
PAX5_ENST00000522003	1	8
FAS	1	1
ANKS1A	1	1
SHF_ENST00000560540	1	1
CPXM2_ENST00000615851	1	1
STK11_ENST00000586243	1	34
PPP1R12B_ENST00000356764	1	1
MITF	1	8
AHCY	1	1
FGFR2_ENST00000369056	1	104
ZBTB4_ENST00000380599	1	1
ERBB2_ENST00000445658	1	74
ZNF644_ENST00000347275	1	1
AL049629.2_ENST00000534312	1	1
DIDO1	1	1
NUDT8_ENST00000301490	1	1
MED12L_ENST00000273432	1	1
DYRK1A_ENST00000647425	1	3
DOCK11	1	1
ATP2B3_ENST00000393842	1	1
SEC24A	1	1
GALNT10_ENST00000377661	1	1
TIAM2_ENST00000528391	1	1
FGFR2_ENST00000356226	1	104
RAD51_ENST00000532743	1	15
ABI2_ENST00000430418	1	1
SENP7_ENST00000394094	1	1
RTN4_ENST00000394611	1	1
DHRS3	1	1
MYC_ENST00000377970	1	8
KNDC1	1	1
CAPN1_ENST00000533820	1	1
FGFR2_ENST00000346997	1	104
CSPG5_ENST00000610462	1	1
SYTL1_ENST00000318074	1	1
PITPNM2_ENST00000542749	1	1
SMARCAL1_ENST00000358207	1	1
HMGXB3_ENST00000613459	1	1
MYO1F	1	1
MITF_ENST00000328528	1	8
ADGRA1_ENST00000607359	1	1
CLEC10A_ENST00000416562	1	1
PCDHB12	1	1
TNFRSF9	1	1
LZTS3_ENST00000329152	1	1
GALNT10_ENST00000425427	1	1
RAD51_ENST00000423169	1	15
PRMT1	1	1
DHX9	1	1
NPHP1_ENST00000445609	1	1
GAS7_ENST00000585266	1	1
CSPG5	1	1
STXBP2_ENST00000414284	1	1
CTNNA3	1	1
FGFR2_ENST00000369059	1	104
RXRA	1	1
UCHL5_ENST00000367449	1	1
TNK2	1	3
LTBP3_ENST00000322147	1	1
C8orf76	1	1
SPTBN2_ENST00000611817	1	1
PITPNM2_ENST00000280562	1	1
SHF_ENST00000560471	1	1
PIGQ	1	1
DYRK1A	1	3
LRRTM3	1	1
ARHGEF26_ENST00000465817	1	1
PLCG2_ENST00000359376	1	8
LRCH3_ENST00000441090	1	1
KMT2B	1	1
DYRK1A_ENST00000338785	1	3
LDHD_ENST00000450168	1	1
ABCC1	1	1
CACNA1F	1	1
TNK2_ENST00000428187	1	3
CDH26_ENST00000350849	1	1
RTN4_ENST00000317610	1	1
PLEKHG5_ENST00000535355	1	1
UCHL5_ENST00000367454	1	1
PRMT1_ENST00000610806	1	1
WDR33	1	1
ZFHX4	1	1
AXL_ENST00000593513	1	10
NPHP1_ENST00000355301	1	1
SLC12A7	1	1
CUX1_ENST00000393824	1	1
PCDHA5_ENST00000529619	1	1
DSP_ENST00000418664	1	1
SALL3	1	1
MAP3K20_ENST00000539448	1	3
IGSF9_ENST00000611023	1	1
CUX1_ENST00000437600	1	1
MET_ENST00000397752	1	54
LRRC7_ENST00000415775	1	1
TLR4_ENST00000472304	1	9
PAX5_ENST00000414447	1	8
SGSM2_ENST00000574563	1	1
ZDHHC8	1	1
EPHB4	1	3
TLR4_ENST00000355622	1	9
SYTL2_ENST00000528231	1	1
ZNF644	1	1
ACSBG1_ENST00000560817	1	1
ZDHHC8_ENST00000320602	1	1
IP6K1_ENST00000395238	1	1
PLXNA4_ENST00000378539	1	1
PCDHA4_ENST00000512229	1	1
WDR3	1	1
C20orf173	1	1
RLBP1	1	1
TSSK6	1	3
FER	1	3
SBF1	1	1
DCC_ENST00000412726	1	1
TSPAN32_ENST00000451520	1	1
FGFR2_ENST00000351936	1	104
ERBB2_ENST00000406381	1	74
AGAP1	1	1
SOX17	1	8
SPTBN4_ENST00000598249	1	1
CCDC148_ENST00000409187	1	1
NEB_ENST00000604864	1	1
PCDHA10_ENST00000506939	1	1
DYRK1A_ENST00000645424	1	3
CACNA1E_ENST00000367567	1	1
EPSTI1	1	1
NEB_ENST00000397345	1	1
HOPX_ENST00000508121	1	1
HNF4G_ENST00000354370	1	1
CCDC148	1	1
MAN1C1_ENST00000374329	1	1
GLI1_ENST00000543426	1	8
KCND1	1	1
FAS_ENST00000352159	1	1
SENP7_ENST00000314261	1	1
CHEK2_ENST00000404276	1	18
CHD3_ENST00000358181	1	1
PCDHA8	1	1
CYP1B1_ENST00000614273	1	1
TIAM2_ENST00000456877	1	1
DYRK1A_ENST00000647504	1	3
ATP2B3_ENST00000370186	1	1
FUT2_ENST00000391876	1	1
RTN4	1	1
MAPKAPK3_ENST00000621469	1	3
DNAH7	1	1
SCARF2	1	1
DIAPH1	1	1
RAD1	1	1
PLK2_ENST00000617412	1	10
DLL1	1	1
PA2G4	1	1
PLXNA4	1	1
PHF2	1	1
ZNF644_ENST00000361321	1	1
PPP1R12B_ENST00000608999	1	1
CUX1_ENST00000425244	1	1
PCDH10	1	1
PLEKHG5	1	1
PIK3C2G	1	8
UNC13B_ENST00000617908	1	1
ARID5B	1	8
PIK3C2G_ENST00000266497	1	8
LRCH3	1	1
AGAP1_ENST00000336665	1	1
NPHP1_ENST00000393272	1	1
CHEK2	1	18
PIGQ_ENST00000470411	1	1
PCDHGA1	1	1
FANCF	1	9
CLEC10A_ENST00000571664	1	1
CPXM2	1	1
PIK3R2_ENST00000617130	1	8
PCDHA9	1	1
ERBB3_ENST00000415288	1	15
SZT2_ENST00000634258	1	1
RTN4_ENST00000357376	1	1
PTPN12	1	1
FGFR2	1	104
SPTBN4_ENST00000392025	1	1
SPTBN4_ENST00000338932	1	1
CHEK2_ENST00000348295	1	18
GAS7_ENST00000323816	1	1
VPS13C_ENST00000645819	1	1
TENT5B	1	1
ADAM23	1	1
LRPPRC_ENST00000409946	1	1
CACNA1E	1	1
RTN4_ENST00000405240	1	1
PDX1	1	1
CNTNAP1	1	1
MAN1C1	1	1
CAPN1	1	1
PCLO_ENST00000423517	1	1
SYNE1_ENST00000423061	1	1
HOPX_ENST00000420433	1	1
TIAM2_ENST00000275246	1	1
PCDHGA6	1	1
LTBP3	1	1
RAD51	1	15
PDZRN3	1	1
CACNA1E_ENST00000360108	1	1
B3GNT6	1	1
NEB_ENST00000427231	1	1
CHEK2_ENST00000405598	1	18
SLC25A41	1	1
DIAPH1_ENST00000647433	1	1
PIK3C2G_ENST00000433979	1	8
TGFBRAP1_ENST00000258449	1	1
CASP8_ENST00000392266	1	8
SLC26A11_ENST00000411502	1	1
MAP9	1	1
CPAMD8_ENST00000388925	1	1
VPS13C_ENST00000249837	1	1
SCARF2_ENST00000622235	1	1
UNC13B_ENST00000635942	1	1
STXBP2	1	1
MAP3K20_ENST00000338983	1	3
ERBB2_ENST00000584601	1	74
AL160272.2	1	1
PLEKHG5_ENST00000400915	1	1
ZNF266	1	1
CHEK2_ENST00000402731	1	18
GPRIN1	1	1
DLGAP3	1	1
MARCKS	1	1
CUX1	1	1
ESR1_ENST00000427531	1	8
CAPN1_ENST00000524773	1	1
SPTBN2_ENST00000617502	1	1
RAD51_ENST00000557850	1	15
MITF_ENST00000314589	1	8
UCHL5_ENST00000367448	1	1
MYC_ENST00000259523	1	8
PCDHB15	1	1
PLEKHG5_ENST00000400913	1	1
LRCH3_ENST00000414675	1	1
PEAK1_ENST00000312493	1	3
TRAPPC9	1	1
CACNA1E_ENST00000367570	1	1
PLEKHG5_ENST00000340850	1	1
PDZRN3_ENST00000479530	1	1
PAX5_ENST00000377852	1	8
PAX5_ENST00000523241	1	8
FAM193A_ENST00000505311	1	1
MAP9_ENST00000515654	1	1
EMSY_ENST00000533988	1	9
AGAP1_ENST00000428334	1	1
CDH26	1	1
PAX5	1	8
PCDHA5	1	1
FUT4	1	1
RTN4_ENST00000402434	1	1
ARHGEF26	1	1
PLXNA4_ENST00000321063	1	1
GRM7_ENST00000389336	1	1
CUX1_ENST00000556210	1	1
ARHGEF26_ENST00000496710	1	1
SENP8_ENST00000542035	1	1
PAX5_ENST00000377853	1	8
QPCT	1	1
SYTL1_ENST00000618673	1	1
FAS_ENST00000357339	1	1
HMGXB3	1	1
GATA5	1	1
PRMT1_ENST00000532489	1	1
OTOF_ENST00000338581	1	1
GALNT10	1	1
PCDHGA4	1	1
LRPPRC_ENST00000409659	1	1
SYTL2_ENST00000634661	1	1
ZNF266_ENST00000588221	1	1
ZNF644_ENST00000370440	1	1
ADAMTS16_ENST00000511368	1	1
GAS7_ENST00000579158	1	1
OTOF_ENST00000339598	1	1
PCDHA3	1	1
ADGRA1_ENST00000392606	1	1
CREBBP_ENST00000382070	1	9
ERBB2_ENST00000541774	1	74
MAP9_ENST00000379248	1	1
CSPG5_ENST00000456150	1	1
OTOF_ENST00000403946	1	1
AXIN1_ENST00000354866	1	60
PLEKHG5_ENST00000377732	1	1
RBM15B	1	1
GLI1	1	8
SPTBN4	1	1
STK36_ENST00000392105	1	3
SPTBN2_ENST00000309996	1	1
KIF2B	1	1
IP6K1_ENST00000460540	1	1
PLK2	1	10
PPID	1	1
ZXDC	1	1
CACNA1F_ENST00000376251	1	1
UNC13B_ENST00000636694	1	1
AGAP1_ENST00000614409	1	1
TVP23A_ENST00000612195	1	1
CYP1B1_ENST00000494864	1	1
UCHL5	1	1
CUX1_ENST00000550008	1	1
AGAP1_ENST00000409538	1	1
FAM193A_ENST00000545951	1	1
MITF_ENST00000448226	1	8
TTC21A	1	1
DIAPH1_ENST00000398557	1	1
MAN1C1_ENST00000611903	1	1
SYTL2_ENST00000389960	1	1
UNC13B_ENST00000396787	1	1
WIPI1	1	1
CPAMD8	1	1
STK36_ENST00000440309	1	3
SYNE1_ENST00000341594	1	1
PXDNL	1	1
TPRN	1	1
ADAM23_ENST00000374415	1	1
PLEKHG5_ENST00000377728	1	1
PAX5_ENST00000520281	1	8
FGFR2_ENST00000613048	1	104
MPC1L	1	1
CAPN1_ENST00000533129	1	1
P2RY13	1	1
MELTF	1	1
HOPX_ENST00000556614	1	1
SGSM2_ENST00000426855	1	1
ANKIB1	1	1
PCDHA1	1	1
MTMR6	1	1
CACNA1E_ENST00000358338	1	1
IP6K1_ENST00000468463	1	1
HRC	1	1
CUX1_ENST00000645010	1	1
FGFR2_ENST00000360144	1	104
ATP2B3	1	1
TGFBRAP1_ENST00000595531	1	1
HOPX_ENST00000553379	1	1
ATP2B3_ENST00000349466	1	1
ZFHX4_ENST00000518282	1	1
DSP	1	1
PIGQ_ENST00000321878	1	1
C20orf173_ENST00000246199	1	1
FER_ENST00000438717	1	3
PCDHA12_ENST00000613593	1	1
HOPX_ENST00000317745	1	1
CHEK2_ENST00000328354	1	18
PHF2_ENST00000375376	1	1
CDH1	1	23
HOPX_ENST00000381260	1	1
TNFRSF9_ENST00000377507	1	1
UCHL5_ENST00000367451	1	1
UNC13B	1	1
SENP8	1	1
CHEK2_ENST00000382565	1	18
COL2A1	1	1
AXIN2_ENST00000611991	1	59
CSPG5_ENST00000264723	1	1
CACNA1E_ENST00000357570	1	1
SYNE1	1	1
CHKB	1	1
CUX1_ENST00000549414	1	1
ACSBG1	1	1
ABCC1_ENST00000399408	1	1
NCAPD3	1	1
MVD	1	1
PCDHB12_ENST00000624949	1	1
PCDHA1_ENST00000394633	1	1
ARHGEF26_ENST00000465093	1	1
C11orf91	1	1
KCNQ1_ENST00000335475	1	1
CCDC105	1	1
GIT1_ENST00000581348	1	1
PIGQ_ENST00000422307	1	1
UBE3C	1	1
SLC26A11	1	1
DYRK1A_ENST00000646548	1	3
WIPI1_ENST00000546360	1	1
PCDHB12_ENST00000622978	1	1
MYO1F_ENST00000613525	1	1
PCDH10_ENST00000618019	1	1
TRAPPC9_ENST00000438773	1	1
PCDHGB1	1	1
GAS7_ENST00000437099	1	1
DDX10	1	1
PDZRN3_ENST00000466780	1	1
SPTBN2_ENST00000529997	1	1
NUDT8	1	1
MET	1	54
COL4A5	1	1
COL4A5_ENST00000361603	1	1
MBD6	1	1
TIAM2_ENST00000360366	1	1
PCDHGB3	1	1
PAX5_ENST00000377847	1	8
CUX1_ENST00000547394	1	1
CUX1_ENST00000292538	1	1
SALL3_ENST00000575389	1	1
SGSM2	1	1
PCDHGA7	1	1
LEFTY1	1	1
CCDC60	1	1
GRM7	1	1
IGSF9_ENST00000361509	1	1
SHF_ENST00000560734	1	1
MED12L	1	1
HRC_ENST00000595625	1	1
GIT1_ENST00000579937	1	1
FGFR2_ENST00000357555	1	104
IFIH1	1	1
GAS7	1	1
AXIN2	1	59
MYO1F_ENST00000644032	1	1
NEB	1	1
SALL3_ENST00000536229	1	1
ESR1_ENST00000443427	1	8
RTN4_ENST00000357732	1	1
NEB_ENST00000603639	1	1
PRMT1_ENST00000391851	1	1
PLCG2	1	8
ZNF142	1	1
SENP7_ENST00000348610	1	1
CACNA1E_ENST00000621551	1	1
ESR1_ENST00000338799	1	8
FGFR2_ENST00000369060	1	104
RAD1_ENST00000341754	1	1
PPP1R9B	1	1
ZNF142_ENST00000449707	1	1
LRCH3_ENST00000438796	1	1
HOPX_ENST00000381255	1	1
DLGAP3_ENST00000235180	1	1
CYP1B1	1	1
FAN1_ENST00000561594	1	1
SYTL2_ENST00000359152	1	1
FAM193A_ENST00000637812	1	1
CASP8_ENST00000392258	1	8
NPHP1_ENST00000417665	1	1
FGFR2_ENST00000369061	1	104
SENP7_ENST00000394091	1	1
DIAPH1_ENST00000253811	1	1
ADAMTS16	1	1
FAN1	1	1
TNK2_ENST00000333602	1	3
STK11	1	34
ZNF629	1	1
MYC_ENST00000613283	1	8
GIT1_ENST00000225394	1	1
ZHX1-C8orf76	1	1
NUDT18_ENST00000613958	1	1
AXL	1	10
IP6K1_ENST00000321599	1	1
ESR1_ENST00000456483	1	8
SLITRK2	1	1
EPSTI1_ENST00000398762	1	1
CCDC148_ENST00000409889	1	1
TSPAN32_ENST00000381121	1	1
EPHB4_ENST00000616502	1	3
GAS7_ENST00000542249	1	1
HMGXB3_ENST00000503427	1	1
MYC_ENST00000524013	1	8
TIAM2_ENST00000529824	1	1
VRTN	1	1
PPP1R12B	1	1
GLI1_ENST00000546141	1	8
CASP8_ENST00000432109	1	8
ATP2B3_ENST00000359149	1	1
MITF_ENST00000642352	1	8
AXIN2_ENST00000618960	1	59
CLEC10A	1	1
MITF_ENST00000472437	1	8
PTPN12_ENST00000415482	1	1
ESR1	1	8
NUAK2	1	3
NEB_ENST00000409198	1	1
CHEK2_ENST00000403642	1	18
RTN4_ENST00000404909	1	1
VPS13C_ENST00000395898	1	1
ARID5B_ENST00000309334	1	8
ITPR3	1	1
DCC	1	1
CHD3	1	1
SHF	1	1
ZNF266_ENST00000588933	1	1
ABI2_ENST00000261018	1	1
PA2G4_ENST00000552766	1	1
USP11_ENST00000377107	1	1
DYRK1A_ENST00000398960	1	3
GIT1	1	1
ADGRA1	1	1
CLEC10A_ENST00000576617	1	1
DIAPH1_ENST00000518047	1	1
HOPX	1	1
ABI2_ENST00000422511	1	1
LSG1	1	1
PCDH8_ENST00000338862	1	1
PCDHA10	1	1
GAS7_ENST00000396115	1	1
AXIN1	1	60
PHC1	1	1
SBF1_ENST00000348911	1	1
TIAM2	1	1
ZBTB4	1	1
SYTL1	1	1
FGFR2_ENST00000478859	1	104
SYTL2_ENST00000527523	1	1
NEB_ENST00000172853	1	1
EML6	1	1
PHC1_ENST00000433083	1	1
PCDHGA4_ENST00000612927	1	1
ERBB3	1	15
CUX1_ENST00000646649	1	1
CUX1_ENST00000546411	1	1
CAPN1_ENST00000279247	1	1
PCLO	1	1
GAS7_ENST00000583882	1	1
FAS_ENST00000355279	1	1
PCDHA11	1	1
HNF4G	1	1
SHISA7	1	1
PCDHGA7_ENST00000617050	1	1
MAP3K20	1	3
PAQR9	1	1
PCDHA12	1	1
CASP8	1	8
PCDHA6	1	1
PCDHGA2	1	1
MYC	1	8
DYRK1A_ENST00000647188	1	3
SLC26A11_ENST00000572725	1	1
CASP8_ENST00000323492	1	8
STK36	1	3
HOPX_ENST00000503639	1	1
ABI2_ENST00000424558	1	1
LRCH3_ENST00000428136	1	1
TLR4	1	9
SALL3_ENST00000616649	1	1
GTF2F1	1	1
HECA	1	1
FAM193A_ENST00000502458	1	1
OTOF_ENST00000402415	1	1
PIK3R2_ENST00000617642	1	8
SHF_ENST00000458022	1	1
PLXNA4_ENST00000423507	1	1
DYRK1A_ENST00000643624	1	3
PCDHGA3	1	1
PHC1_ENST00000544916	1	1
FAM193A	1	1
PTPN12_ENST00000435495	1	1
CACNA1E_ENST00000621791	1	1
PPP1R12B_ENST00000480184	1	1
PCLO_ENST00000618073	1	1
SHCBP1L	1	1
CREBBP	1	9
TSPAN32_ENST00000612299	1	1
ZDHHC8_ENST00000334554	1	1
C11orf65_ENST00000525729	1	2
PIGQ_ENST00000409527	1	1
C20orf173_ENST00000374345	1	1
HOPX_ENST00000555760	1	1
STXBP2_ENST00000221283	1	1
TSPAN32	1	1
PIK3R2	1	8
TANGO6	1	1
REXO4	1	1
SPTBN2	1	1
CUX1_ENST00000622516	1	1
AC091959.3	1	1
DYRK1A_ENST00000644942	1	3
ABI2_ENST00000261016	1	1
KCNQ1	1	1
AXL_ENST00000359092	1	10
PRSS41	1	1
ZNF266_ENST00000592292	1	1
SLITRK2_ENST00000370490	1	1
DIDO1_ENST00000395343	1	1
OTOF	1	1
DOCK11_ENST00000276204	1	1
PEAK1_ENST00000558305	1	3
POU3F3	1	1
MAP2K4_ENST00000353533	1	42
ITPR3_ENST00000605930	1	1
ESR1_ENST00000206249	1	8
UNC13B_ENST00000378496	1	1
FAT4	1	1
CUX1_ENST00000292535	1	1
PAX5_ENST00000523145	1	8
LDHD	1	1
LZTS3	1	1
CHD3_ENST00000330494	1	1
AHCY_ENST00000538132	1	1
LRCH3_ENST00000425562	1	1
PLEKHG5_ENST00000377740	1	1
CDH26_ENST00000244049	1	1
GAS7_ENST00000580865	1	1
ZNF319	1	1
CASP8_ENST00000264274	1	8
PLEKHG5_ENST00000377725	1	1
AXIN2_ENST00000375702	1	59
EPSTI1_ENST00000313624	1	1
DYRK1A_ENST00000398956	1	3
TTC21A_ENST00000440121	1	1
LRRC7	1	1
MAPKAPK3_ENST00000357955	1	3
PCDHA7	1	1
FAN1_ENST00000561607	1	1
PCDHA2	1	1
VPS13C_ENST00000395896	1	1
MAP3K20_ENST00000409176	1	3
CASP8_ENST00000264275	1	8
VPS13C	1	1
PITPNM2	1	1
UNC13B_ENST00000378495	1	1
HOPX_ENST00000337881	1	1
DIAPH1_ENST00000389057	1	1
DDX10_ENST00000526794	1	1
PCDHA4	1	1
PDZRN3_ENST00000462146	1	1
PCDH8	1	1
SZT2	1	1
COL2A1_ENST00000337299	1	1
SYTL1_ENST00000616558	1	1
FAM193A_ENST00000382839	1	1
AL117348.2	1	1
EPHB4_ENST00000360620	1	3
TGFBRAP1	1	1
ZNF266_ENST00000590306	1	1
RAD1_ENST00000628399	1	1
ABI2_ENST00000261017	1	1
PAX5_ENST00000520154	1	8
IP6K1	1	1
ERBB2_ENST00000584450	1	74
PEAK1	1	3
PLEKHG5_ENST00000377748	1	1
WDR3_ENST00000369441	1	1
