# Supplementary material for: Genomic mutation features identify distinct BRCA-associated mutation characteristics in endometrioid carcinoma and endometrioid ovarian carcinoma
Source: Aging (Albany NY). 2021 Nov 27;13(22):24686–709. doi: 10.18632/aging.203710 (PMC8660599; doi:10.18632/aging.203710)
Supplement: Supplementary Table 2 [file aging-13-203710-s003.xlsx]

## Sheet: Sheet1
Supplementary Table 2. Sample information on endometrioid carcinoma from COSMIC.
Gene name	Mutated samples	Samples tested
PTEN	1033	2092
PIK3CA_ENST00000643187	504	1956
PIK3CA	502	1956
CTNNB1	411	1874
CTNNB1_ENST00000644524	395	1874
CTNNB1_ENST00000643031	395	1874
CTNNB1_ENST00000647264	395	1874
CTNNB1_ENST00000642836	395	1874
CTNNB1_ENST00000453024	395	1874
CTNNB1_ENST00000646174	395	1874
CTNNB1_ENST00000646381	395	1874
CTNNB1_ENST00000644873	395	1874
CTNNB1_ENST00000646369	395	1874
CTNNB1_ENST00000645982	395	1874
CTNNB1_ENST00000647390	395	1874
CTNNB1_ENST00000642992	395	1874
CTNNB1_ENST00000643541	395	1874
CTNNB1_ENST00000441708	395	1874
CTNNB1_ENST00000450969	395	1874
CTNNB1_ENST00000644678	395	1874
CTNNB1_ENST00000642315	395	1874
CTNNB1_ENST00000646116	395	1874
CTNNB1_ENST00000405570	395	1874
CTNNB1_ENST00000642248	395	1874
CTNNB1_ENST00000645493	395	1874
CTNNB1_ENST00000396183	395	1874
CTNNB1_ENST00000642426	395	1874
CTNNB1_ENST00000433400	395	1874
CTNNB1_ENST00000645210	395	1874
CTNNB1_ENST00000642886	395	1874
CTNNB1_ENST00000646725	395	1874
CTNNB1_ENST00000396185	395	1874
CTNNB1_ENST00000643992	395	1874
CTNNB1_ENST00000431914	395	1874
CTNNB1_ENST00000644867	395	1874
CTNNB1_ENST00000643977	395	1874
CTNNB1_ENST00000642986	395	1874
CTNNB1_ENST00000349496	395	1874
CTNNB1_ENST00000645276	395	1874
CTNNB1_ENST00000643297	395	1874
CTNNB1_ENST00000645900	395	1874
CTNNB1_ENST00000644138	392	1874
KRAS_ENST00000311936	387	2300
KRAS	383	2300
KRAS_ENST00000557334	382	2300
KRAS_ENST00000556131	362	2300
ARID1A	314	1025
ARID1A_ENST00000430799	285	1025
ARID1A_ENST00000457599	285	1025
FGFR2_ENST00000358487	280	2343
ARID1A_ENST00000374152	273	1025
POLE	241	3709
CTCF	232	1321
CTCF_ENST00000646771	230	1321
CTCF_ENST00000264010	230	1321
CTCF_ENST00000645699	230	1321
CTCF_ENST00000644753	230	1321
CTCF_ENST00000642819	230	1321
CTCF_ENST00000401394	230	1321
CTCF_ENST00000645306	230	1321
TP53	198	1363
TP53_ENST00000455263	187	1363
TP53_ENST00000610292	187	1363
TP53_ENST00000359597	187	1363
TP53_ENST00000617185	187	1363
TP53_ENST00000622645	187	1363
TP53_ENST00000445888	187	1363
TP53_ENST00000620739	187	1363
TP53_ENST00000420246	187	1363
TP53_ENST00000413465	187	1363
TP53_ENST00000610538	187	1363
TP53_ENST00000615910	187	1363
TP53_ENST00000619485	187	1363
TP53_ENST00000618944	177	1359
TP53_ENST00000504290	177	1359
TP53_ENST00000504937	177	1359
TP53_ENST00000510385	177	1359
TP53_ENST00000619186	177	1359
TP53_ENST00000610623	177	1359
ZFHX3_ENST00000268489	169	1188
ZFHX3	169	1188
ZFHX3_ENST00000397992	169	1188
PIK3R1	149	716
ARID1A_ENST00000615191	145	956
PIK3R1_ENST00000521657	140	716
PIK3R1_ENST00000320694	136	716
PIK3R1_ENST00000336483	135	716
PIK3R1_ENST00000523872	134	716
FGFR2_ENST00000613048	133	2343
FGFR2_ENST00000356226	133	2343
FGFR2_ENST00000369061	133	2343
FGFR2_ENST00000351936	133	2343
FGFR2_ENST00000346997	133	2343
FGFR2_ENST00000369060	133	2343
FGFR2_ENST00000357555	133	2343
FGFR2	133	2343
FGFR2_ENST00000369059	133	2343
FGFR2_ENST00000369056	130	2343
FGFR2_ENST00000360144	130	2343
FGFR2_ENST00000478859	126	2343
PCDHA2	121	551
PCDHA1_ENST00000394633	120	551
PCDHA1	120	551
PCDHGA1	111	551
TTN	107	551
TTN_ENST00000615779	107	551
TTN_ENST00000591111	107	551
TTN_ENST00000342175	107	551
PCDHA3	107	551
TTN_ENST00000342992	107	551
TTN_ENST00000460472	107	551
PCDHA5_ENST00000529619	107	551
TTN_ENST00000359218	107	551
PCDHA5	107	551
PCDHGA2	106	551
PCDHA4	99	551
PCDHA6_ENST00000527624	98	551
PCDHA4_ENST00000512229	98	551
PCDHA6	95	551
PCDHGB1	90	551
POLE_ENST00000535270	88	3709
PCDHGA3	88	551
PCDHA7	86	551
PCDHA8	85	551
PCDHGA7	80	551
FBXW7	79	839
FBXW7_ENST00000603841	79	839
FBXW7_ENST00000281708	79	839
PCDHGB2	75	551
PCDHGA4	75	551
KMT2D	74	650
FBXW7_ENST00000296555	74	839
FBXW7_ENST00000263981	74	839
FBXW7_ENST00000393956	74	839
PCDHA10	73	551
PCDHA10_ENST00000506939	73	551
PCDHGA5	73	551
MUC16	73	551
PCDHGB3	72	551
FAT1	71	649
FAT1_ENST00000614102	71	649
PPP2R1A	70	1251
PCDHA9	69	551
BCOR_ENST00000342274	67	648
PPP2R1A_ENST00000462990	66	1251
BCOR_ENST00000397354	66	648
BCOR	66	648
BCOR_ENST00000378455	66	648
KMT2C_ENST00000355193	65	649
KMT2C	65	649
PCDHGA6	62	551
PCDHA11	61	551
MUC4_ENST00000475231	60	551
MUC4_ENST00000346145	60	551
MUC4_ENST00000349607	60	551
MUC4	60	551
PCDHGB4	59	551
CSMD3	58	551
CSMD3_ENST00000455883	58	551
RYR2	57	551
RYR2_ENST00000360064	57	551
CSMD3_ENST00000343508	57	551
PCDHGA8	56	551
DMD	55	551
DMD_ENST00000620040	55	551
DMD_ENST00000619831	55	551
DMD_ENST00000378677	55	551
MED12	53	650
MED12_ENST00000374102	53	650
MED12_ENST00000333646	53	650
PCDHGB5	53	551
FAT4	52	551
ZFHX4_ENST00000518282	52	551
MUC5B	52	551
ZFHX4	52	551
MTOR	52	648
FLG	50	551
ATM_ENST00000452508	50	652
ATM	50	652
OBSCN_ENST00000636875	49	551
PCDHGA9	49	551
OBSCN_ENST00000366707	49	551
OBSCN	49	551
FAT3_ENST00000409404	49	551
AF241726.2	49	551
OBSCN_ENST00000422127	49	551
BCOR_ENST00000378463	48	646
APC	48	767
APC_ENST00000508376	48	767
OBSCN_ENST00000284548	47	551
CHD4_ENST00000645645	47	620
NEB_ENST00000603639	47	551
NEB	47	551
JAK1	47	649
MACF1_ENST00000372915	47	551
NEB_ENST00000172853	47	551
CHD4_ENST00000645022	47	620
FAT3	47	551
CHD4_ENST00000643335	47	620
CHD4_ENST00000642879	47	620
CHD4_ENST00000645095	47	620
NEB_ENST00000604864	47	551
MACF1_ENST00000567887	47	551
CHD4	47	620
MACF1	47	551
NEB_ENST00000397345	47	551
PCDHGB6	47	551
CHD4_ENST00000357008	47	620
NEB_ENST00000409198	47	551
CHD4_ENST00000646806	47	620
NEB_ENST00000427231	47	551
CHD4_ENST00000544484	47	620
CHD4_ENST00000645005	47	620
MACF1_ENST00000564288	46	551
USH2A	45	551
ABCA13	45	551
SPEN	45	650
HMCN1	45	551
TAF1_ENST00000373790	45	551
PCDHA12	45	551
SYNE1_ENST00000341594	45	551
SYNE1	45	551
SYNE1_ENST00000423061	45	551
TAF1	45	551
NF1_ENST00000356175	45	652
TAF1_ENST00000276072	45	551
NF1	45	652
DST	45	551
MUC17	44	551
RYR1	44	551
LRP1	44	551
RYR1_ENST00000355481	44	551
DST_ENST00000421834	43	551
AHNAK2	43	551
ANK3	43	551
DST_ENST00000361203	43	551
ANK3_ENST00000503366	43	551
DST_ENST00000370788	43	551
ANK3_ENST00000373827	43	551
LRP2	43	551
RYR3_ENST00000634418	43	551
ADGRG4	42	551
RYR3_ENST00000389232	42	551
RYR3_ENST00000415757	42	551
MDN1	42	551
RYR3	42	551
MDN1_ENST00000629399	42	551
ATR	42	1256
RYR3_ENST00000622037	42	551
ADGRG4_ENST00000370652	42	551
ADGRG4_ENST00000394141	42	551
CSMD1_ENST00000520002	41	551
MMP26	41	551
DST_ENST00000244364	41	551
TENM1_ENST00000371130	41	551
MGA_ENST00000570161	41	647
CSMD1_ENST00000602723	41	551
CSMD1_ENST00000400186	41	551
MGA	41	647
MACF1_ENST00000289893	41	551
CSMD1	41	551
MGA_ENST00000545763	41	647
BIRC6	41	551
CSMD1_ENST00000602557	41	551
ARHGAP35	41	551
BRAF	41	2719
ARHGAP35_ENST00000614079	41	551
MGA_ENST00000566586	41	647
LRP1B	41	554
TENM1	41	551
PCDHGA10	40	551
DICER1_ENST00000527414	40	654
BRCA2	40	653
NSD1_ENST00000347982	40	646
HERC1	40	551
DICER1	40	654
DNAH5	40	551
BRCA2_ENST00000544455	40	653
DICER1_ENST00000541352	40	654
DICER1_ENST00000393063	40	654
DICER1_ENST00000343455	40	654
DSCAM	39	551
ARID5B	39	646
MKI67	39	551
MKI67_ENST00000368653	39	551
PCDHGB7	39	551
PCLO	39	551
EP300	39	650
FAT4_ENST00000335110	39	551
ANK3_ENST00000355288	39	551
CSMD1_ENST00000537824	39	551
ARID1B	38	647
TRRAP_ENST00000355540	38	551
ANKRD11_ENST00000642600	38	646
UBR4	38	551
TRRAP	38	551
TRRAP_ENST00000628380	38	551
NBEA_ENST00000629018	38	551
DSCAM_ENST00000617870	38	551
ARID1B_ENST00000350026	38	647
NBEA	38	551
ARID1B_ENST00000636930	38	647
ANKRD11_ENST00000378330	38	646
NBEA_ENST00000379939	38	551
PCLO_ENST00000423517	38	551
DNAH3	38	551
NBEA_ENST00000310336	38	551
APOB	38	551
ANKRD11	38	646
AC058822.1	38	562
TRRAP_ENST00000446306	38	551
DYNC1H1	37	551
CACNA1E	37	551
SMARCA4_ENST00000642726	37	648
SMARCA4_ENST00000642628	37	648
CACNA1E_ENST00000358338	37	551
BRAF_ENST00000644969	37	2719
ALG13_ENST00000621367	37	551
PCDH15_ENST00000621708	37	551
BRAF_ENST00000496384	37	2719
SMARCA4_ENST00000646484	37	648
CACNA1E_ENST00000360108	37	551
PCDH15_ENST00000616114	37	551
ALG13_ENST00000436609	37	551
SMARCA4_ENST00000643549	37	648
CREBBP_ENST00000382070	37	648
SMARCA4_ENST00000590574	37	648
SYNE2_ENST00000554584	37	551
SMARCA4	37	648
SYNE2_ENST00000357395	37	551
SMARCA4_ENST00000646693	37	648
PCDH15_ENST00000495484	37	551
SMARCA4_ENST00000444061	37	648
SMARCA4_ENST00000645460	37	648
SMARCA4_ENST00000429416	37	648
SMARCA4_ENST00000541122	37	648
PCDH15_ENST00000414778	37	551
CACNA1E_ENST00000367570	37	551
CREBBP	37	648
CACNA1E_ENST00000621791	37	551
SMARCA4_ENST00000413806	37	648
SMARCA4_ENST00000589677	37	648
CACNA1E_ENST00000357570	37	551
SYNE2_ENST00000344113	37	551
SYNE2	37	551
SMARCA4_ENST00000646510	37	648
PCDHGA12	37	551
ALG13	37	551
CACNA1E_ENST00000367567	37	551
PCDH15_ENST00000644397	37	551
PCDH15_ENST00000373965	37	551
CACNA1E_ENST00000621551	37	551
ALG13_ENST00000610588	37	551
SMARCA4_ENST00000643296	37	648
SMARCA4_ENST00000647230	37	648
SMARCA4_ENST00000644737	37	648
SMARCA4_ENST00000450717	37	648
NTRK1_ENST00000392302	37	646
BRAF_ENST00000288602	37	2719
PCDH15_ENST00000614895	37	551
ALG13_ENST00000251943	37	551
STAG2_ENST00000371160	36	649
SACS_ENST00000423156	36	551
RASA1	36	646
HUWE1_ENST00000262854	36	551
HUWE1	36	551
LRCH2	36	551
ATRX_ENST00000395603	36	650
HERC2	36	551
STAG2_ENST00000371144	36	649
KMT2B	36	551
ATRX	36	650
STAG2_ENST00000371145	36	649
SACS_ENST00000402364	36	551
HUWE1_ENST00000612484	36	551
DNAH9	36	551
DNAH9_ENST00000454412	36	551
SACS	36	551
ARID5B_ENST00000309334	36	646
STAG2	36	649
MSH6	36	876
CCDC168	36	551
SACS_ENST00000455470	36	551
STAG2_ENST00000371157	36	649
LRCH2_ENST00000538422	36	551
NSD1	35	646
DNAH2_ENST00000389173	35	551
RASA1_ENST00000506290	35	645
TET1	35	647
PCDHGA11_ENST00000518882	35	551
EP400_ENST00000389561	35	551
ADGRV1_ENST00000645211	35	551
EP400	35	551
PCDHGA11	35	551
LAMA2_ENST00000617695	35	551
LAMA2	35	551
AHNAK2_ENST00000557457	35	551
USP9X	35	551
ADGRV1	35	551
RASA1_ENST00000456692	35	645
AKAP9	35	551
RASA1_ENST00000512763	35	645
LAMA2_ENST00000618192	35	551
DNAH10_ENST00000409039	35	551
USP9X_ENST00000378308	35	551
AKAP9_ENST00000359028	35	551
DNAH10	35	551
NSD1_ENST00000354179	35	646
DNAH2	35	551
GIGYF2_ENST00000629305	34	551
PTPRD_ENST00000355233	34	646
GIGYF2_ENST00000409196	34	551
CHD3_ENST00000358181	34	551
VCAN_ENST00000502527	34	551
PTPRD_ENST00000486161	34	646
PTPRB	34	551
KIAA1109_ENST00000388738	34	551
PTPRD_ENST00000397617	34	646
PTPRD_ENST00000397611	34	646
PTPRD_ENST00000540109	34	646
PTPRD_ENST00000356435	34	646
XIRP2_ENST00000409728	34	551
XIRP2_ENST00000409605	34	551
GIGYF2_ENST00000373563	34	551
GIGYF2_ENST00000409480	34	551
VCAN	34	551
KALRN_ENST00000360013	34	551
PTPRD_ENST00000537002	34	646
KIAA1109	34	551
PTPRD	34	646
ZAN_ENST00000546292	34	551
GIGYF2_ENST00000409547	34	551
C11orf65_ENST00000525729	34	559
XIRP2	34	551
XIRP2_ENST00000409273	34	551
GIGYF2	34	551
TSPEAR_ENST00000613245	34	551
VCAN_ENST00000512590	34	551
XIRP2_ENST00000409043	34	551
CHD3_ENST00000330494	34	551
VCAN_ENST00000342785	34	551
ZAN_ENST00000618565	34	551
PLXNA4_ENST00000321063	34	551
CSMD2_ENST00000619121	34	551
TSPEAR	34	551
PTPRD_ENST00000397606	34	646
CSMD2_ENST00000373388	34	551
ZAN	34	551
CSMD2	34	551
TSPEAR_ENST00000614657	34	551
SVEP1	34	551
VCAN_ENST00000343200	34	551
SVEP1_ENST00000401783	34	551
XIRP2_ENST00000628543	34	551
CHD3	34	551
PLXNA4	34	551
ZAN_ENST00000620596	34	551
MYCBP2	33	551
AHNAK_ENST00000530124	33	551
PTPRS_ENST00000592099	33	646
SETD2	33	650
RNF213_ENST00000508628	33	551
RB1	33	648
ASPM	33	551
CCND1	33	646
ZNF292	33	551
FBXO11_ENST00000405808	33	568
PKHD1L1	33	551
DYNC2H1	33	551
DYNC2H1_ENST00000334267	33	551
THOC2	33	551
THOC2_ENST00000355725	33	551
MYCBP2_ENST00000357337	33	551
PTPRS_ENST00000262963	33	646
LYST	33	551
DNAH7	33	551
PTPRB_ENST00000550358	33	551
ZNF292_ENST00000339907	33	551
GRIN2A_ENST00000562109	33	650
GRIN2A_ENST00000330684	33	650
WDFY4	33	551
AHNAK	33	551
UGT1A8	33	551
DSP	33	551
LYST_ENST00000389794	33	551
AHNAK_ENST00000257247	33	551
ANKRD30A_ENST00000602533	33	551
DSP_ENST00000418664	33	551
PTPRS	33	646
ASPM_ENST00000294732	33	551
DYNC2H1_ENST00000375735	33	551
RNF213	33	551
GRIN2A	33	650
ATP11C_ENST00000370557	33	551
PTPRS_ENST00000353284	33	646
PTPRS_ENST00000588012	33	646
FAM135B	32	551
PCDHA13	32	551
COL11A1_ENST00000512756	32	551
PRKDC_ENST00000338368	32	551
DNAH8	32	551
AKAP9_ENST00000358100	32	551
FLNA_ENST00000369856	32	551
CACNA1F_ENST00000323022	32	551
GRIN2A_ENST00000535259	32	650
ATP11C_ENST00000361648	32	551
CDH23_ENST00000224721	32	551
FLNA_ENST00000610817	32	551
FLNA_ENST00000422373	32	551
KMT2A	32	646
CACNA1F	32	551
HECTD4_ENST00000550722	32	551
DNHD1	32	551
PCDH15_ENST00000437009	32	551
PCDHA13_ENST00000409494	32	551
PCDH15_ENST00000320301	32	551
RANBP2	32	551
COL11A1_ENST00000358392	32	551
MET	32	817
MAP3K1	32	648
MET_ENST00000397752	32	817
LRRK2	32	551
ATP11C	32	551
MSH6_ENST00000540021	32	876
PKD1L1	32	551
NAV3	32	551
DNHD1_ENST00000527990	32	551
HECTD4	32	551
NOTCH3	32	646
COL11A1	32	551
PCDH15_ENST00000617051	32	551
PCDH15_ENST00000395433	32	551
FLNA_ENST00000360319	32	551
CDH23_ENST00000622827	32	551
PCDH15_ENST00000395432	32	551
WDFY3	32	551
KMT2A_ENST00000389506	32	646
PCDH15_ENST00000622048	32	551
MSH6_ENST00000622629	32	876
MSH6_ENST00000614496	32	876
PCDH15_ENST00000395430	32	551
PCDH15	32	551
ARID2	32	650
NAV3_ENST00000536525	32	551
FLNA	32	551
PCDH15_ENST00000361849	32	551
PRKDC	32	551
COL11A1_ENST00000353414	32	551
CACNA1F_ENST00000376251	32	551
KDM5A	31	646
ITPR1_ENST00000456211	31	551
AKT1_ENST00000555528	31	953
PRG4	31	551
AKT1_ENST00000554848	31	953
VPS13B_ENST00000357162	31	551
PRG4_ENST00000367483	31	551
MYO3A_ENST00000265944	31	551
KDM5C	31	647
NIPBL	31	551
CEP290_ENST00000309041	31	551
PIK3CG	31	646
PXDN	31	551
UTRN	31	551
ITPR1_ENST00000354582	31	551
ITPR1_ENST00000443694	31	551
DMXL1	31	551
TRIM5_ENST00000380027	31	551
KDM5C_ENST00000452825	31	647
CEP290	31	551
BRWD3	31	551
ABCA12	31	551
VWA8	31	551
NCOR1_ENST00000395851	31	647
ABCA12_ENST00000389661	31	551
HRNR	31	551
MYH7	31	551
PKHD1	31	551
AKT1_ENST00000402615	31	953
AKT1	31	953
MSH6_ENST00000538136	31	875
SMG1	31	551
PRG4_ENST00000635041	31	551
PRG4_ENST00000367485	31	551
ITPR1_ENST00000357086	31	551
ARID2_ENST00000422737	31	650
ITPR1	31	551
ITPR1_ENST00000544951	31	551
DNAH8_ENST00000359357	31	551
DMXL1_ENST00000311085	31	551
NCOR1_ENST00000395857	31	647
PIK3CG_ENST00000440650	31	646
KIT	31	823
KDM5C_ENST00000404049	31	647
NCOR1	31	647
FAM186A_ENST00000543111	31	551
FAM186A	31	551
TENM3	31	551
PTPRB_ENST00000550857	31	551
VPS13B	31	551
AKT1_ENST00000407796	31	953
UGT1A10	31	551
CNTNAP5	31	551
PTPRB_ENST00000261266	31	551
MYO3A	31	551
SI	31	551
PIK3CG_ENST00000496166	31	646
AKT1_ENST00000349310	31	953
MYO3A_ENST00000543632	31	551
PTPRB_ENST00000538708	31	551
PCDH15_ENST00000395445	30	551
PCDH15_ENST00000612394	30	551
PCDH15_ENST00000395438	30	551
ALK	30	732
NFASC_ENST00000360049	30	551
DOCK1	30	551
ALMS1	30	551
DNAH17	30	551
ANKRD30A_ENST00000611781	30	551
PGK1_ENST00000644362	30	551
EPHA5_ENST00000354839	30	646
KDM5C_ENST00000375383	30	647
NAV2_ENST00000349880	30	551
ANKRD30A_ENST00000374660	30	551
FN1_ENST00000443816	30	551
ASTN2	30	551
FN1_ENST00000323926	30	551
EYS	30	551
FN1_ENST00000356005	30	551
TENM4	30	551
EPHA5	30	646
AR	30	649
NFASC_ENST00000401399	30	551
NFASC_ENST00000404907	30	551
FN1	30	551
FN1_ENST00000432072	30	551
EPHA5_ENST00000432638	30	646
ASH1L	30	551
ASH1L_ENST00000368346	30	551
ANKRD30A	30	551
NAV2_ENST00000360655	30	551
LRBA_ENST00000510413	30	551
NFASC	30	551
RELN	30	551
ASTN2_ENST00000361477	30	551
PCDH15_ENST00000395440	30	551
TAF1L	30	551
PCDH15_ENST00000395446	30	551
TECTA_ENST00000264037	30	551
IGF2R	30	551
ALMS1_ENST00000484298	30	551
DOCK1_ENST00000280333	30	551
PCDH15_ENST00000613657	30	551
NAV2_ENST00000396085	30	551
KDM5C_ENST00000375379	30	647
NFE2L2_ENST00000397063	30	756
NFE2L2_ENST00000446151	30	756
NAV2_ENST00000540292	30	551
FBN2_ENST00000262464	30	551
FN1_ENST00000421182	30	551
EPHA5_ENST00000511294	30	646
PCDH15_ENST00000409834	30	551
RELN_ENST00000424685	30	551
FN1_ENST00000357867	30	551
TECTA_ENST00000642222	30	551
FAT2	30	551
EYS_ENST00000503581	30	551
AR_ENST00000612452	30	649
NFE2L2	30	756
EPHA5_ENST00000613740	30	646
UGT1A10_ENST00000373445	30	551
FN1_ENST00000359671	30	551
TTN_ENST00000360870	30	551
MED12L	30	551
NFE2L2_ENST00000464747	30	756
TSHZ3	30	551
ARID1B_ENST00000637904	30	647
FN1_ENST00000336916	30	551
TECTA	30	551
ASTN2_ENST00000313400	30	551
F8	30	551
NFASC_ENST00000539706	30	551
ABCB1_ENST00000543898	30	551
AKAP13	30	551
PIKFYVE	30	551
ASPM_ENST00000367408	30	551
PCDH15_ENST00000617271	30	551
MED13L	30	551
DNAH17_ENST00000585328	30	551
FBN2_ENST00000619499	30	551
NAV2_ENST00000527559	30	551
LRBA	30	551
NFASC_ENST00000404076	30	551
FBN2	30	551
EPHA5_ENST00000273854	30	646
RELN_ENST00000343529	30	551
FN1_ENST00000446046	30	551
AR_ENST00000396044	30	649
PCDH15_ENST00000395442	30	551
AKAP13_ENST00000394518	30	551
ARID1B_ENST00000635849	30	647
NAV2	30	551
CUBN	30	551
ABCB1_ENST00000265724	30	551
SCN1A_ENST00000375405	29	551
SCN1A_ENST00000635750	29	551
ATP7A_ENST00000343533	29	551
ATP7A	29	551
SPTBN1_ENST00000615901	29	551
ERBB4_ENST00000402597	29	648
SCN1A_ENST00000640036	29	551
SCN1A_ENST00000423058	29	551
CACNA1C_ENST00000327702	29	551
TG	29	551
PTCH1_ENST00000430669	29	647
NAV3_ENST00000644176	29	551
NFASC_ENST00000513543	29	551
UGT1A9	29	551
SCN1A_ENST00000641575	29	551
KIAA1217	29	551
SPTA1_ENST00000368147	29	551
TNRC6A	29	551
DMD_ENST00000541735	29	551
SCN1A_ENST00000637988	29	551
CACNA1C_ENST00000402845	29	551
CACNA1C_ENST00000399597	29	551
CIC	29	647
SCN1A_ENST00000635776	29	551
CIC_ENST00000160740	29	647
BCORL1	29	553
CACNA1C_ENST00000399655	29	551
PTCH1_ENST00000437951	29	647
SCN1A_ENST00000641603	29	551
MGAM_ENST00000475668	29	551
CACNA1C_ENST00000344100	29	551
KIAA1217_ENST00000458595	29	551
PCDHA2_ENST00000520672	29	551
CACNA1C_ENST00000399637	29	551
ROS1_ENST00000368507	29	646
KIAA1217_ENST00000430453	29	551
DMD_ENST00000474231	29	551
CACNA1C_ENST00000399595	29	551
CIC_ENST00000572681	29	647
SZT2	29	551
CACNA1C_ENST00000399638	29	551
SPTBN1	29	551
CACNA1C_ENST00000399644	29	551
MED12L_ENST00000273432	29	551
CACNA1C_ENST00000399617	29	551
CACNA1C_ENST00000399634	29	551
PTCH1_ENST00000375274	29	647
CACNA1C_ENST00000399606	29	551
CACNA1C_ENST00000406454	29	551
ANKRD30B	29	551
MGAM	29	551
KIAA1217_ENST00000376452	29	551
CACNA1C_ENST00000399629	29	551
BCORL1_ENST00000218147	29	553
CACNA1C_ENST00000335762	29	551
CACNA1C_ENST00000399649	29	551
DMD_ENST00000378707	29	551
NIPBL_ENST00000448238	29	551
DMD_ENST00000359836	29	551
CACNA1C_ENST00000399603	29	551
SCN1A_ENST00000409050	29	551
CACNA1C	29	551
SND1	29	551
STAB2	29	551
SPTA1	29	551
ERBB4_ENST00000436443	29	648
ERBB4	29	648
ABCB1	29	551
HYDIN	29	551
KIAA1217_ENST00000376462	29	551
SCN1A	29	551
CACNA1C_ENST00000399621	29	551
DCHS1	29	551
CACNA1C_ENST00000399641	29	551
ROS1	29	646
CACNA1C_ENST00000399591	29	551
TNRC6A_ENST00000315183	29	551
MGAM_ENST00000620571	29	551
CACNA1C_ENST00000399601	29	551
CASP8_ENST00000323492	28	647
NTRK3_ENST00000626019	28	649
MYOM1_ENST00000400569	28	551
CASP8_ENST00000264274	28	647
MYO15A_ENST00000615845	28	551
PCDHGC3_ENST00000617222	28	551
NTRK3_ENST00000394480	28	649
NRXN1_ENST00000625672	28	551
FRY_ENST00000647500	28	551
NRXN1	28	551
FRY_ENST00000645780	28	551
HIVEP1	28	551
NRXN1_ENST00000401669	28	551
MYO18B_ENST00000536101	28	551
SPOP_ENST00000503676	28	714
PCDHGC3	28	551
PRRC2C	28	551
DNAH11_ENST00000328843	28	551
CAMTA1	28	551
KATNAL2	28	551
TCHH	28	551
GOLGB1_ENST00000614479	28	551
DNAH11_ENST00000620169	28	551
HIVEP3_ENST00000372584	28	551
PRRC2C_ENST00000426496	28	551
NTRK3_ENST00000557856	28	649
CHD7_ENST00000524602	28	551
NTRK3_ENST00000629765	28	649
SPOP_ENST00000504102	28	714
DNAH11	28	551
CASP8	28	647
NTRK3_ENST00000357724	28	649
HIVEP3_ENST00000643665	28	551
ACACB	28	551
PCDHGC3_ENST00000617641	28	551
BRIP1	28	646
KATNAL2_ENST00000356157	28	551
PPFIA2_ENST00000548586	28	551
ACACB_ENST00000377848	28	551
SPOP_ENST00000347630	28	714
HIVEP3	28	551
CASP8_ENST00000264275	28	647
MYO15A	28	551
CHD7	28	551
PKHD1_ENST00000340994	28	551
UGT1A7	28	551
MYO15A_ENST00000647165	28	551
MYOM1	28	551
PRRC2C_ENST00000367742	28	551
NRXN1_ENST00000630543	28	551
DOCK3	28	551
TCHH_ENST00000368804	28	551
MYOM1_ENST00000261606	28	551
NRXN1_ENST00000406316	28	551
ARID1B_ENST00000637810	28	645
FLT1	28	646
FNDC1	28	551
MYO18B	28	551
SPOP	28	714
USP34	28	551
GLI3	28	551
PPFIA2	28	551
MTOR_ENST00000376838	28	648
SZT2_ENST00000634258	28	551
NTRK3	28	649
NTRK3_ENST00000355254	28	649
PPFIA2_ENST00000552948	28	551
MYO18B_ENST00000335473	28	551
HIVEP1_ENST00000541134	28	551
AL132671.2	28	557
SSPO	28	551
PPFIA2_ENST00000549325	28	551
GOLGB1	28	551
HIVEP1_ENST00000627968	28	551
GOLGB1_ENST00000340645	28	551
PAPPA2	28	551
PRDM9	28	551
CASP8_ENST00000432109	28	647
NRXN1_ENST00000405472	28	551
PPFIA2_ENST00000550584	28	551
PPFIA2_ENST00000443686	27	551
PLCG2	27	646
PTCH1_ENST00000418258	27	647
FRAS1	27	551
NTRK3_ENST00000558676	27	649
WNK3_ENST00000620763	27	551
PRPF8	27	551
NRK	27	551
SVIL	27	551
MYH11_ENST00000576790	27	551
ASXL3	27	551
LAMA3_ENST00000399516	27	551
KIF5A	27	551
PTCH1	27	647
HBG2_ENST00000380252	27	551
FREM1	27	551
TRIO	27	551
WNK3	27	551
ZNF462	27	551
MYO16_ENST00000357550	27	551
MYO16	27	551
CACNA1B_ENST00000277551	27	551
SLITRK3	27	551
SCN10A	27	551
CACNA1B_ENST00000277549	27	551
SF3B1	27	647
CACNA1B_ENST00000371363	27	551
PLCG2_ENST00000359376	27	646
DCHS2_ENST00000357232	27	551
DNAH8_ENST00000449981	27	551
MYH11_ENST00000452625	27	551
CPAMD8	27	551
WNK3_ENST00000375169	27	551
ERBB3	27	649
SCN10A_ENST00000643924	27	551
WNK3_ENST00000375159	27	551
SCN10A_ENST00000643108	27	551
NPAP1	27	551
MYO16_ENST00000356711	27	551
SVIL_ENST00000375400	27	551
PPFIA2_ENST00000333447	27	551
EPHB1	27	646
PTCH1_ENST00000429896	27	647
ERBB3_ENST00000415288	27	649
MSH2	27	684
UNC80_ENST00000272845	27	551
THOC2_ENST00000491737	27	551
KIAA1217_ENST00000396445	27	551
PLXNA2	27	551
CPAMD8_ENST00000388925	27	551
PPFIA2_ENST00000407050	27	551
ALPK3	27	551
KIAA1217_ENST00000376451	27	551
INSR	27	646
CACNA1B_ENST00000371357	27	551
LAMA3	27	551
SVIL_ENST00000375398	27	551
LRBA_ENST00000507224	27	551
MYH11_ENST00000300036	27	551
PTCH1_ENST00000421141	27	647
FREM1_ENST00000380880	27	551
INSR_ENST00000341500	27	646
UNC80	27	551
MYH11	27	551
PLCE1	27	551
CMYA5	27	551
CACNA1B_ENST00000371355	27	551
PPFIA2_ENST00000550359	27	551
FREM2	27	551
CACNA1B	27	551
SCN10A_ENST00000644826	27	551
CDH10	27	551
PRPF8_ENST00000304992	27	551
SLITRK3_ENST00000241274	27	551
KIF5A_ENST00000286452	27	551
NOS1	26	551
CACNA1G_ENST00000352832	26	551
COL7A1	26	551
RLF	26	551
CACNA1D_ENST00000645528	26	551
CACNA1D_ENST00000422281	26	551
CACNA1G_ENST00000515165	26	551
FAM208B	26	551
TIAM1_ENST00000541036	26	551
LCT	26	551
PLCL1	26	551
AC010487.3	26	551
REV3L_ENST00000368805	26	551
GLI3_ENST00000479210	26	551
MYH4	26	551
CACNA1G_ENST00000507510	26	551
CACNA1G_ENST00000514079	26	551
PTPRT	26	650
CACNA1G_ENST00000507336	26	551
SCAF4	26	551
PDZD2	26	551
GRIA3_ENST00000620443	26	551
HBE1_ENST00000380237	26	551
ANKRD17_ENST00000330838	26	551
HBE1	26	551
RNF43_ENST00000581868	26	647
SRCAP_ENST00000395059	26	551
SIPA1L2_ENST00000262861	26	551
CACNA1G_ENST00000513964	26	551
NOS1_ENST00000338101	26	551
AC001226.2_ENST00000638101	26	551
CACNA1G_ENST00000505165	26	551
DCC	26	551
RNF43	26	647
SCAF4_ENST00000434667	26	551
CACNA1D_ENST00000636570	26	551
CASK_ENST00000378154	26	551
KNTC1	26	551
PTPRT_ENST00000373187	26	650
HCFC1_ENST00000369984	26	551
CACNA1G_ENST00000354983	26	551
NOS1_ENST00000344089	26	551
CASK_ENST00000421587	26	551
REV3L	26	551
CASK_ENST00000645986	26	551
CASK_ENST00000378166	26	551
CACNA1G_ENST00000514717	26	551
SIPA1L2	26	551
TRPM6_ENST00000361255	26	551
SDK1_ENST00000615806	26	551
CACNA1D_ENST00000637424	26	551
CASK_ENST00000646120	26	551
CIT	26	551
CACNA1D_ENST00000350061	26	551
CENPF	26	551
RP1_ENST00000637698	26	551
CACNA1G_ENST00000429973	26	551
CNTNAP2	26	551
CASK_ENST00000644219	26	551
PCNX2	26	551
NID2_ENST00000617139	26	551
PCDH19_ENST00000420881	26	551
TRPM6	26	551
GRIA3	26	551
SDK1_ENST00000389531	26	551
CIT_ENST00000612548	26	551
AKAP6_ENST00000557272	26	551
SDK1	26	551
CACNA1G_ENST00000510366	26	551
SIN3A_ENST00000360439	26	551
PTPRT_ENST00000373193	26	650
SRCAP	26	551
AMER1_ENST00000374869	26	649
MYPN_ENST00000540630	26	551
CACNA1G_ENST00000358244	26	551
CASK_ENST00000442742	26	551
FAM208B_ENST00000645567	26	551
PCDH19_ENST00000255531	26	551
RP1_ENST00000636932	26	551
ALMS1_ENST00000614410	26	551
CACNA1G_ENST00000360761	26	551
NOTCH2	26	650
ANKRD17	26	551
FRY_ENST00000642040	26	551
LAMA1	26	551
CASK_ENST00000644347	26	551
RP1	26	551
MYO10_ENST00000274203	26	551
CACNA1G_ENST00000507609	26	551
TRPM6_ENST00000449912	26	551
GRIA3_ENST00000541091	26	551
CIT_ENST00000261833	26	551
CASK_ENST00000378163	26	551
MYPN_ENST00000354393	26	551
FRY	26	551
HCFC1	26	551
ITPR2	26	551
PCDH19	26	551
PLCE1_ENST00000371375	26	551
MYPN	26	551
RNF43_ENST00000583753	26	647
INPP4B_ENST00000508116	26	646
ALK_ENST00000618119	26	732
CACNA1G_ENST00000502264	26	551
REV3L_ENST00000368802	26	551
INPP4B_ENST00000513000	26	646
CACNA1G_ENST00000512389	26	551
MYO10	26	551
PLCE1_ENST00000371385	26	551
AKAP6	26	551
NID2	26	551
PTPRT_ENST00000373184	26	650
RNF43_ENST00000577716	26	647
INPP4B_ENST00000262992	26	646
TIAM1	26	551
SCAF4_ENST00000399804	26	551
SPEG	26	551
CASK_ENST00000378158	26	551
CACNA1G_ENST00000507896	26	551
PI4KA	26	551
PTPRT_ENST00000373201	26	650
CACNA1G_ENST00000515411	26	551
AMER1	26	649
CACNA1G_ENST00000514181	26	551
REV3L_ENST00000435970	26	551
CACNA1G	26	551
KNTC1_ENST00000450485	26	551
CASK	26	551
PTPRT_ENST00000373190	26	650
SIN3A	26	551
PLCL1_ENST00000437704	26	551
CACNA1G_ENST00000513689	26	551
MXRA5	26	551
ABCA1	26	551
FRY_ENST00000380250	26	551
DNAH6_ENST00000237449	26	551
FMN2	26	551
NRAS	26	875
CACNA1G_ENST00000515765	26	551
MYPN_ENST00000613327	26	551
SMC6_ENST00000402989	26	551
DNAH6	26	551
SIN3A_ENST00000394949	26	551
CASK_ENST00000646087	26	551
PTPRT_ENST00000356100	26	650
CACNA1G_ENST00000510115	26	551
GRIA3_ENST00000620581	26	551
ESR1_ENST00000427531	26	655
NOS1_ENST00000317775	26	551
CACNA1G_ENST00000442258	26	551
CACNA1G_ENST00000503485	26	551
MROH2B	26	551
IRS4	25	551
ROBO1_ENST00000618833	25	551
FBN3_ENST00000601739	25	551
CEP350	25	551
SETX	25	551
KDM6A_ENST00000611820	25	648
FLNC	25	551
PDE4DIP_ENST00000524974	25	551
THSD7A	25	551
EGFR	25	819
PREX2	25	553
L1CAM_ENST00000361981	25	551
ARHGAP21_ENST00000612832	25	551
TANC2	25	551
KDM6A_ENST00000543216	25	648
SIPA1L1_ENST00000381232	25	551
ALPK2	25	551
CELSR1	25	551
MARF1	25	551
TRPM1_ENST00000397795	25	551
DOCK2	25	551
INPP4B	25	645
ABCA8_ENST00000430352	25	551
SMARCA1	25	551
KIF1B_ENST00000622724	25	551
L1CAM_ENST00000361699	25	551
LRRC7	25	551
ROBO1_ENST00000467549	25	551
SDK2	25	551
FBN3_ENST00000270509	25	551
CTNNA1_ENST00000627109	25	551
PPL	25	551
TENM2_ENST00000518659	25	551
INPP4A_ENST00000409463	25	646
PDE4DIP_ENST00000585156	25	551
DNAH14_ENST00000445597	25	551
MTUS2	25	551
CDH8_ENST00000577730	25	551
SPTAN1_ENST00000358161	25	551
EIF4G3	25	551
PCDH17	25	551
INPP4A_ENST00000409851	25	646
MYH10	25	551
ESR1_ENST00000456483	25	655
TET2_ENST00000380013	25	647
ROBO1	25	551
EIF4G3_ENST00000634879	25	551
FLNC_ENST00000346177	25	551
ESR1_ENST00000338799	25	655
TET2	25	647
EIF4G3_ENST00000602326	25	551
KIF1B_ENST00000377081	25	551
SON_ENST00000300278	25	551
ARHGAP21_ENST00000320481	25	551
LRRC7_ENST00000415775	25	551
CUX1_ENST00000437600	25	551
AC116366.3_ENST00000638452	25	559
SPTAN1_ENST00000372731	25	551
CACNA1D	25	551
MYT1L_ENST00000428368	25	551
SIPA1L1	25	551
ESR1_ENST00000406599	25	655
INPP4A_ENST00000409016	25	646
PCDHB5	25	551
LRRC7_ENST00000310961	25	551
SIPA1L1_ENST00000358550	25	551
CUL9	25	551
NCKAP5	25	551
ADAMTS19_ENST00000274487	25	551
KIF1B_ENST00000377086	25	551
GNAS_ENST00000313949	25	734
NCKAP5_ENST00000317721	25	551
ARHGAP31	25	551
SPTAN1	25	551
ACACB_ENST00000377854	25	551
KIF1B_ENST00000620295	25	551
CUX1_ENST00000425244	25	551
EPHB1_ENST00000493838	25	646
ESR1	25	655
KDM6A_ENST00000621147	25	648
MARF1_ENST00000548025	25	551
ASXL2_ENST00000435504	25	646
ROBO1_ENST00000436010	25	551
NTRK3_ENST00000542733	25	649
MARF1_ENST00000540441	25	551
KDM6A_ENST00000382899	25	648
PCNT	25	551
CDH19	25	551
AC008695.1	25	551
NCKAP5_ENST00000409213	25	551
SCN3A	25	551
ABCA8_ENST00000269080	25	551
CUX1_ENST00000292538	25	551
KIF1B	25	551
NOL4_ENST00000589544	25	551
MYT1L	25	551
ASXL2_ENST00000336112	25	646
UGT1A6_ENST00000373424	25	551
NUP214_ENST00000451030	25	551
MROH2B_ENST00000506092	25	551
PPP1R3A	25	551
CUL9_ENST00000372647	25	551
RGPD3	25	551
SPTBN1_ENST00000333896	25	551
ABCA8	25	551
TANC2_ENST00000389520	25	551
EIF4G3_ENST00000264211	25	551
INPP4A_ENST00000523221	25	646
SCN3A_ENST00000360093	25	551
CDH8_ENST00000299345	25	551
ANK1_ENST00000347528	25	551
SMARCA1_ENST00000371122	25	551
PLEC_ENST00000354958	25	551
MARF1_ENST00000551742	25	551
CUX1_ENST00000393824	25	551
PDE4DIP	25	551
PDE4DIP_ENST00000618462	25	551
PLEC	25	551
CUX1_ENST00000622516	25	551
TRPM1	25	551
SPTAN1_ENST00000630804	25	551
ANK1_ENST00000289734	25	551
CTNNA1	25	551
ROBO1_ENST00000618846	25	551
GNAS_ENST00000371075	25	734
ANK1	25	551
UGT1A6	25	551
SCN3A_ENST00000409101	25	551
SLITRK2	25	551
KDM3B	25	551
ADAMTS19	25	551
MYT1L_ENST00000644820	25	551
PDE4DIP_ENST00000369354	25	551
SRRM2_ENST00000630499	25	551
NUP214	25	551
NUP214_ENST00000411637	25	551
CUX1_ENST00000547394	25	551
PLEKHB2_ENST00000404460	25	551
SMARCA1_ENST00000371123	25	551
TET2_ENST00000513237	25	647
DNAH14_ENST00000430092	25	551
AC116366.3_ENST00000638568	25	559
SPTAN1_ENST00000630866	25	551
EIF4G3_ENST00000374935	25	551
ROBO1_ENST00000495273	25	551
TRPM1_ENST00000256552	25	551
CDH8	25	551
NCKAP5_ENST00000405974	25	551
DNAH14_ENST00000439375	25	551
KDM6A	25	648
PPL_ENST00000590782	25	551
KDM6A_ENST00000536777	25	648
THSD7A_ENST00000617773	25	551
BOD1L1	25	551
SRRM2	25	551
ESR1_ENST00000443427	25	655
BAZ2B_ENST00000392782	25	551
BRWD1	25	551
SCN3A_ENST00000639244	25	551
BAZ2B	25	551
ESR1_ENST00000206249	25	655
FBN3	25	551
ARHGAP21	25	551
NOL4	25	551
RNF43_ENST00000407977	25	647
MYH10_ENST00000269243	25	551
MYH10_ENST00000379980	25	551
AC116366.3	25	559
INPP4A	25	646
CHL1_ENST00000620033	24	551
WDR87_ENST00000303868	24	551
RBBP6	24	551
CARD11	24	647
WDR87	24	551
TNRC6B_ENST00000301923	24	551
ZNF536	24	551
CENPP	24	551
PCDHA12_ENST00000613593	24	551
COL6A3_ENST00000472056	24	551
SORL1	24	551
PCDH11X_ENST00000373097	24	551
SCN5A_ENST00000455624	24	551
PLEC_ENST00000398774	24	551
CLASP1_ENST00000397587	24	551
PLEC_ENST00000527096	24	551
COL6A3_ENST00000409809	24	551
CLASP1_ENST00000409078	24	551
SAMD9_ENST00000620985	24	551
CLASP1_ENST00000541377	24	551
PHIP	24	551
COL6A3	24	551
RBBP6_ENST00000348022	24	551
ZEB2	24	551
SALL4_ENST00000371539	24	551
WWC3	24	551
PCDH9	24	551
ADCY8_ENST00000377928	24	551
OTOF	24	551
DMXL2_ENST00000251076	24	551
ZEB2_ENST00000637045	24	551
PTPN13_ENST00000316707	24	551
C11orf65	24	557
RGPD3_ENST00000304514	24	551
CADPS	24	551
CLASP1_ENST00000455322	24	551
NCOA6_ENST00000612493	24	551
CRB1_ENST00000535699	24	551
NTRK3_ENST00000540489	24	649
TNN_ENST00000621086	24	551
PCDH11X_ENST00000361655	24	551
CRB1	24	551
POLQ_ENST00000621776	24	551
PLEC_ENST00000357649	24	551
PRUNE2_ENST00000443509	24	551
INSRR	24	646
MEGF8	24	551
ANKRD17_ENST00000509867	24	551
LRRIQ1	24	551
CTNNA1_ENST00000518825	24	551
RBBP6_ENST00000381039	24	551
INPP4A_ENST00000409540	24	646
FAM47A	24	551
SCN5A_ENST00000450102	24	551
PCDH11X_ENST00000504220	24	551
GRIN2B	24	551
COL6A3_ENST00000353578	24	551
COL5A1_ENST00000618395	24	551
KDM3B_ENST00000542866	24	551
BSN	24	551
TRANK1	24	551
SCN9A_ENST00000303354	24	551
DNAH1	24	551
DMXL2	24	551
PLEC_ENST00000356346	24	551
SPHKAP_ENST00000344657	24	551
CADPS_ENST00000283269	24	551
TNRC6B_ENST00000402203	24	551
SCN5A_ENST00000414099	24	551
TSC2	24	648
RBMXL3	24	551
PTPN13	24	551
EGFR_ENST00000454757	24	819
POLQ	24	551
PCDHB6	24	551
PCDH11X_ENST00000373088	24	551
TRANK1_ENST00000645898	24	551
SCN5A_ENST00000451551	24	551
SCN5A	24	551
SLIT3	24	551
UNC79_ENST00000553484	24	551
PCDH9_ENST00000544246	24	551
MEGF8_ENST00000378073	24	551
ZEB2_ENST00000409487	24	551
ADCY8	24	551
SIPA1L1_ENST00000537413	24	551
CHL1	24	551
BPTF_ENST00000321892	24	551
SCN5A_ENST00000425664	24	551
ZEB2_ENST00000636026	24	551
NTRK3_ENST00000317501	24	649
XPO1	24	649
SCN5A_ENST00000449557	24	551
DMXL2_ENST00000449909	24	551
VWF	24	551
PRUNE2	24	551
PCDH9_ENST00000456367	24	551
PLEC_ENST00000354589	24	551
PLEC_ENST00000436759	24	551
TNN	24	551
MAGEC1_ENST00000406005	24	551
PTPN13_ENST00000511467	24	551
CRB1_ENST00000538660	24	551
MAGEC1	24	551
PRUNE2_ENST00000428286	24	551
IGSF9B	24	551
BPTF_ENST00000342579	24	551
ZEB2_ENST00000636413	24	551
FAM47A_ENST00000613251	24	551
PXDNL	24	551
ZEB2_ENST00000419938	24	551
MYH1	24	551
KALRN_ENST00000460856	24	551
CELSR3	24	551
COL6A3_ENST00000347401	24	551
COL22A1	24	551
DCC_ENST00000412726	24	551
KATNAL2_ENST00000592005	24	551
VPS13D_ENST00000613099	24	551
BPTF_ENST00000644067	24	551
UNC79	24	551
ESR2_ENST00000556275	24	551
SAMD9	24	551
SCN5A_ENST00000333535	24	551
CLASP1_ENST00000646274	24	551
CLASP1	24	551
TNRC6B	24	551
UNC79_ENST00000555664	24	551
NCOA6	24	551
PCDH11X_ENST00000406881	24	551
ZZEF1	24	551
XPO1_ENST00000404992	24	649
MAGEC3	24	551
BPTF	24	551
VPS13D	24	551
RIMS2	24	551
NCOA6_ENST00000359003	24	551
SCN9A_ENST00000645907	24	551
SLIT3_ENST00000519560	24	551
SALL4	24	551
TNN_ENST00000622870	24	551
PCDH11X	24	551
KALRN	24	551
SCN9A	24	551
ZEB2_ENST00000303660	24	551
SCN9A_ENST00000644316	24	551
AC004076.1	24	551
SPHKAP	24	551
CADPS_ENST00000612439	24	551
MEGF8_ENST00000334370	24	551
ZEB2_ENST00000638087	24	551
PCDHB6_ENST00000622991	24	551
ZEB2_ENST00000558170	24	551
SASH1	24	551
IGSF9B_ENST00000321016	24	551
SCN8A_ENST00000545061	24	551
TNRC6B_ENST00000335727	24	551
SCN5A_ENST00000423572	24	551
PTPN13_ENST00000427191	24	551
SCN9A_ENST00000409435	24	551
ZEB2_ENST00000636471	24	551
PLEC_ENST00000345136	24	551
SCN4A	24	551
SCN9A_ENST00000642356	24	551
COL22A1_ENST00000435777	24	551
HTT	24	551
UNC79_ENST00000393151	24	551
ATP10A	24	551
XPO1_ENST00000406957	24	649
ADAMTS16	24	551
SALL4_ENST00000395997	24	551
PTPN13_ENST00000411767	24	551
CHD5	24	551
COL5A1	24	551
KIF26B	24	551
CRB1_ENST00000367399	24	551
CFAP47	24	551
ZEB2_ENST00000539609	24	551
OTOF_ENST00000403946	24	551
SCN8A	24	551
RNF43_ENST00000577625	24	647
ZEB2_ENST00000638007	24	551
CADPS_ENST00000357948	24	551
PDGFRA	24	814
CHL1_ENST00000397491	24	551
KIF21B	23	551
DDR2	23	647
NID1	23	551
CNTN6	23	551
TNIK_ENST00000284483	23	551
ZNF532_ENST00000591808	23	551
DOCK7_ENST00000340370	23	551
CTNNA3	23	551
MED13	23	551
GPR158	23	551
DYSF_ENST00000409366	23	551
CAD_ENST00000403525	23	551
SYNE2_ENST00000555002	23	551
NCKAP1L	23	551
SYNJ1	23	551
DOCK7_ENST00000454575	23	551
TEX15	23	551
TRPM3_ENST00000358082	23	551
CHD8_ENST00000643469	23	551
SLIT2_ENST00000503837	23	551
TSC2_ENST00000644043	23	648
GRM1_ENST00000355289	23	551
CELSR2	23	551
CDC73	23	649
COL4A6_ENST00000372216	23	551
ANKHD1-EIF4EBP3	23	551
NHSL2	23	551
CHD8_ENST00000557364	23	551
FOXP1_ENST00000318789	23	646
ANKHD1_ENST00000297183	23	551
OTOGL_ENST00000646859	23	551
GRM1	23	551
HEATR1	23	551
DYSF_ENST00000409582	23	551
CACNA2D3_ENST00000620722	23	551
KIAA1217_ENST00000307544	23	551
KIAA1217_ENST00000396446	23	551
TSC2_ENST00000382538	23	648
GRM1_ENST00000507907	23	551
TSC2_ENST00000439673	23	648
ITPR3_ENST00000605930	23	551
ABCA9_ENST00000453985	23	551
CCNB3_ENST00000376038	23	551
TNIK_ENST00000470834	23	551
DYSF_ENST00000409762	23	551
RIF1	23	551
RIF1_ENST00000453091	23	551
ZNF804B	23	551
HEATR1_ENST00000366581	23	551
DAPK1_ENST00000469640	23	551
DAPK1	23	551
OTOGL	23	551
CACNA2D3_ENST00000415676	23	551
TSC2_ENST00000643946	23	648
SPTB_ENST00000389722	23	551
DAPK1_ENST00000622514	23	551
SCN8A_ENST00000355133	23	551
DYSF_ENST00000410041	23	551
SAMD9L_ENST00000437805	23	551
ZC3H13	23	551
KIF21B_ENST00000461742	23	551
SON	23	551
COL19A1	23	551
CDH1	23	732
GRM1_ENST00000492807	23	551
ICE1	23	551
RTL9	23	551
TENM2_ENST00000519204	23	551
TSC2_ENST00000646388	23	648
ERCC5_ENST00000602836	23	646
AFDN_ENST00000351017	23	551
OTOGL_ENST00000458043	23	551
PTPRZ1_ENST00000449182	23	551
MORC4_ENST00000255495	23	551
DNMT1	23	646
RIMS2_ENST00000507740	23	551
SYNJ1_ENST00000382491	23	551
ZC3H13_ENST00000282007	23	551
RIF1_ENST00000430328	23	551
ZFC3H1	23	551
MAP1B	23	551
SNRNP200	23	551
GPRASP1_ENST00000444152	23	551
UNC79_ENST00000621021	23	551
SLIT2_ENST00000622093	23	551
MORC4	23	551
TRPM3_ENST00000360823	23	551
WNK1_ENST00000530271	23	551
PCDHAC1	23	551
SAMD9L_ENST00000610760	23	551
DYSF_ENST00000413539	23	551
L1CAM_ENST00000370055	23	551
DOP1A	23	551
ZNFX1_ENST00000371754	23	551
ARHGAP6	23	551
ASXL1_ENST00000306058	23	647
NFE2L2_ENST00000423513	23	751
TNIK_ENST00000357327	23	551
ASXL1_ENST00000646985	23	647
TRPM3_ENST00000396280	23	551
KIF21B_ENST00000332129	23	551
DNMT1_ENST00000340748	23	646
KIF20B_ENST00000260753	23	551
SAMD9L	23	551
DOCK11_ENST00000276204	23	551
SCN8A_ENST00000599343	23	551
PTPRZ1	23	551
TRPM3_ENST00000408909	23	551
TSC2_ENST00000643088	23	648
COL4A6_ENST00000545689	23	551
SAMD9L_ENST00000411955	23	551
RET_ENST00000615310	23	740
ANKHD1	23	551
ARID2_ENST00000444670	23	648
CDH1_ENST00000611625	23	732
RET	23	740
DOCK7_ENST00000635123	23	551
AFDN_ENST00000400822	23	551
ZNF532_ENST00000591083	23	551
FOXP1_ENST00000493089	23	646
CHD8_ENST00000430710	23	551
TENM2	23	551
MCF2	23	551
MYO10_ENST00000505695	23	551
CDH1_ENST00000422392	23	732
RIF1_ENST00000444746	23	551
SORCS1	23	551
NID1_ENST00000366595	23	551
CCNB3_ENST00000348603	23	551
DYSF_ENST00000409744	23	551
SCN8A_ENST00000627620	23	551
TNIK_ENST00000475336	23	551
COL4A6_ENST00000621266	23	551
DOP1A_ENST00000349129	23	551
CNTN4	23	551
TRPM3_ENST00000377105	23	551
CACNA2D3	23	551
ANK2	23	551
TRPM3	23	551
TSC2_ENST00000401874	23	648
HSPG2	23	551
TEX15_ENST00000643185	23	551
CHD8_ENST00000645929	23	551
ABCA9	23	551
CAD	23	551
SLIT2_ENST00000503823	23	551
ARFGEF1	23	551
FBN1	23	551
LAMB2_ENST00000305544	23	551
ASXL1_ENST00000613218	23	647
RIMS2_ENST00000262231	23	551
TSC2_ENST00000642936	23	648
COL4A6_ENST00000538570	23	551
CUX1_ENST00000646649	23	551
CNTN4_ENST00000427331	23	551
BCOR_ENST00000615339	23	648
AFDN_ENST00000344191	23	551
BDP1	23	551
EGFR_ENST00000455089	23	819
TSC2_ENST00000350773	23	648
ADAMTS20	23	551
CNTN6_ENST00000350110	23	551
BRWD1_ENST00000380800	23	551
ANK2_ENST00000506722	23	551
TNIK	23	551
TNIK_ENST00000460047	23	551
ANK2_ENST00000394537	23	551
ZNF532_ENST00000591230	23	551
CDC73_ENST00000635846	23	649
JMJD1C_ENST00000542921	23	551
PTPRB_ENST00000551525	23	551
SYNJ1_ENST00000382499	23	551
CACNA2D3_ENST00000490478	23	551
CCNB3	23	551
GRM1_ENST00000282753	23	551
KCND2	23	551
SON_ENST00000381692	23	551
ZNF532	23	551
TEX15_ENST00000256246	23	551
DAPK1_ENST00000358077	23	551
VPS13A_ENST00000376636	23	551
CATSPER1	23	551
CNTN4_ENST00000418658	23	551
TRPM3_ENST00000377111	23	551
MYO9A_ENST00000564571	23	551
COL4A6_ENST00000334504	23	551
POTEE	23	551
CCNB3_ENST00000276014	23	551
ASXL1	23	647
WNK1_ENST00000535572	23	551
DOCK11	23	551
SYNJ1_ENST00000630077	23	551
SPTB_ENST00000556626	23	551
DOCK7_ENST00000634264	23	551
WNK1_ENST00000315939	23	551
SPTB	23	551
TRPM3_ENST00000357533	23	551
DYSF_ENST00000429174	23	551
SBF2	23	551
EPDR1_ENST00000476620	23	551
DOP1A_ENST00000369739	23	551
TNIK_ENST00000488470	23	551
CRB1_ENST00000638467	23	551
RIMS2_ENST00000436393	23	551
TRPM3_ENST00000396285	23	551
RIF1_ENST00000428287	23	551
CUX1	23	551
FOXP1	23	646
DOP1B	23	551
ZNF729	23	551
AFDN_ENST00000447894	23	551
IGSF1_ENST00000370904	23	551
CHD8_ENST00000399982	23	551
NHSL2_ENST00000631375	23	551
SLIT2	23	551
TSC2_ENST00000568454	23	648
DAPK1_ENST00000472284	23	551
CEP290_ENST00000547691	23	551
WNK1_ENST00000537687	23	551
AFDN	23	551
MYO9A_ENST00000444904	23	551
DSCAML1	23	551
DYSF	23	551
TRPM3_ENST00000396292	23	551
DYSF_ENST00000258104	23	551
FOXP1_ENST00000475937	23	646
TSC2_ENST00000642797	23	648
JMJD1C	23	551
TNIK_ENST00000341852	23	551
CACNA1C_ENST00000480911	23	551
KIF21B_ENST00000360529	23	551
CDH1_ENST00000612417	23	732
COL4A6	23	551
SYNJ1_ENST00000357345	23	551
UTP20	23	551
TSC2_ENST00000642561	23	648
KIF20B	23	551
ZEB2_ENST00000637304	23	551
GPRASP1_ENST00000415986	23	551
DOCK7	23	551
MYO10_ENST00000515803	23	551
MCF2_ENST00000414978	23	551
ZEB2_ENST00000638128	23	551
DDR2_ENST00000367921	23	647
GPRASP1_ENST00000361600	23	551
CDH1_ENST00000621016	23	732
TSC2_ENST00000644335	23	648
CHD8	23	551
TSC2_ENST00000644329	23	648
GPRASP1	23	551
DYSF_ENST00000409651	23	551
SLIT2_ENST00000273739	23	551
MCF2_ENST00000520602	23	551
MET_ENST00000436117	23	817
RTL9_ENST00000540313	23	551
ZNF532_ENST00000589288	23	551
DAPK1_ENST00000491893	23	551
ZEB2_ENST00000440875	23	551
WNK1	23	551
CUX1_ENST00000645010	23	551
DYSF_ENST00000394120	23	551
RABGAP1	23	551
ITPR3	23	551
L1CAM	23	551
CACNA2D3_ENST00000288197	23	551
DSCAML1_ENST00000527706	23	551
AFDN_ENST00000392112	23	551
DOCK7_ENST00000635253	23	551
ASXL1_ENST00000620121	23	647
NHS_ENST00000615422	22	551
POLA1_ENST00000379059	22	551
FANCM	22	551
DOCK6	22	551
WDR36_ENST00000612402	22	551
PIN4_ENST00000423432	22	551
AFDN_ENST00000392108	22	551
KCNMA1_ENST00000372443	22	551
KCNMA1_ENST00000639544	22	551
KCNMA1_ENST00000638306	22	551
MCM3AP_ENST00000291688	22	551
EPHA3_ENST00000494014	22	646
ABCC2	22	551
POLD1_ENST00000595904	22	840
NWD1	22	551
LAMB2	22	551
MSH2_ENST00000543555	22	684
GOLGA4_ENST00000444882	22	551
ASXL2	22	646
IBTK_ENST00000510291	22	551
MSH2_ENST00000645506	22	684
VPS13A_ENST00000376634	22	551
POLD1_ENST00000440232	22	840
TNC_ENST00000537320	22	551
MYH13	22	551
ZIM2	22	551
NCOA6_ENST00000616167	22	551
KCNMA1	22	551
KCNMA1_ENST00000626620	22	551
CADPS2	22	551
LRP6_ENST00000543091	22	551
ERCC6L_ENST00000373657	22	551
USP25_ENST00000285681	22	551
EPB41L3_ENST00000540638	22	551
PRR14L	22	551
FBN2_ENST00000508989	22	551
NIN_ENST00000245441	22	551
RAB3GAP1_ENST00000264158	22	551
KCNMA1_ENST00000638991	22	551
KCNMA1_ENST00000639090	22	551
ZIM2_ENST00000593711	22	551
MCM3AP	22	551
TDRD6_ENST00000544460	22	551
HECW2_ENST00000644030	22	551
TDRD6	22	551
EPRS	22	551
UBR5	22	551
KCNMA1_ENST00000639591	22	551
MED24_ENST00000394127	22	551
FANCM_ENST00000542564	22	551
CADPS2_ENST00000334010	22	551
POLA1_ENST00000611764	22	551
RAB3GAP1	22	551
RALGAPA2	22	551
ZMYM3	22	551
ITIH6	22	551
ZIM2_ENST00000599935	22	551
NIN	22	551
FLNB_ENST00000358537	22	551
KCNMA1_ENST00000639489	22	551
ZMYM3_ENST00000373984	22	551
MDC1	22	646
SCN2A	22	551
NHS_ENST00000398097	22	551
JMJD1C_ENST00000639129	22	551
KCNMA1_ENST00000640141	22	551
PTPRF_ENST00000438120	22	551
NUP98	22	551
FLG2	22	551
MAP7D2_ENST00000452324	22	551
USF3_ENST00000478658	22	551
EPB41L3_ENST00000544123	22	551
MAP7D2_ENST00000443379	22	551
KCNMA1_ENST00000434208	22	551
TRPC3_ENST00000264811	22	551
TRPA1	22	551
KCNMA1_ENST00000640605	22	551
AHCTF1_ENST00000366508	22	551
ENPP3_ENST00000358229	22	551
VPS13A_ENST00000645632	22	551
WDR36	22	551
NIN_ENST00000324330	22	551
POLD1_ENST00000599857	22	840
AC008758.1	22	551
TRO_ENST00000399736	22	551
EPB41L3	22	551
DOCK2_ENST00000520908	22	551
C3	22	551
FOCAD	22	551
CTNNA2_ENST00000496558	22	551
TEX10	22	551
SPTB_ENST00000389720	22	551
NWD1_ENST00000552788	22	551
CTNNA2	22	551
KCNMA1_ENST00000640807	22	551
EPB41L3_ENST00000545076	22	551
KCNMA1_ENST00000638759	22	551
TNC_ENST00000535648	22	551
ZMYM3_ENST00000373988	22	551
SCN2A_ENST00000636985	22	551
AHCTF1	22	551
KCNMA1_ENST00000286627	22	551
NRG1_ENST00000356819	22	551
MCF2L2_ENST00000473233	22	551
MYO9A	22	551
KCNMA1_ENST00000638575	22	551
DOCK9	22	551
KCNMA1_ENST00000639601	22	551
ADGRB3	22	551
USF3	22	551
ERCC6L	22	551
KCNMA1_ENST00000372440	22	551
TNC_ENST00000542877	22	551
NWD1_ENST00000379808	22	551
NWD1_ENST00000549814	22	551
KCNMA1_ENST00000640523	22	551
NIN_ENST00000382043	22	551
KEAP1_ENST00000393623	22	752
PRDM2_ENST00000376048	22	551
NHS	22	551
POLA1	22	551
KCNMA1_ENST00000640834	22	551
MED24_ENST00000614384	22	551
DMD_ENST00000343523	22	551
HECW2_ENST00000409111	22	551
ENPP3	22	551
MICAL3	22	551
LRP6	22	551
CDH7_ENST00000323011	22	551
IBTK	22	551
AR_ENST00000612010	22	649
MSH2_ENST00000406134	22	684
TRPC3	22	551
HECW2_ENST00000644256	22	551
USP25	22	551
HECW2_ENST00000644978	22	551
TNC_ENST00000423613	22	551
FAM47C	22	551
PREX1	22	551
POLD1	22	840
TRO_ENST00000319167	22	551
MYH13_ENST00000252172	22	551
CADPS2_ENST00000615869	22	551
NUP98_ENST00000359171	22	551
SPTB_ENST00000389721	22	551
BIVM-ERCC5	22	555
HECW2	22	551
MAP7D2_ENST00000379651	22	551
SCN2A_ENST00000283256	22	551
CHD6	22	551
PRDM2	22	551
FLNB	22	551
KRTAP10-4_ENST00000622352	22	551
NRG1_ENST00000405005	22	551
KCNMA1_ENST00000639486	22	551
DICER1_ENST00000556045	22	653
UBR5_ENST00000220959	22	551
UBR5_ENST00000521922	22	551
NUP98_ENST00000355260	22	551
TRO_ENST00000622017	22	551
IQGAP2_ENST00000379730	22	551
USF3_ENST00000491165	22	551
RAD50	22	646
IBTK_ENST00000610980	22	551
KCNMA1_ENST00000638203	22	551
NOL4_ENST00000538587	22	551
AR_ENST00000613054	22	649
FOCAD_ENST00000338382	22	551
MAP7D2	22	551
UNC13C	22	551
KCNMA1_ENST00000639913	22	551
KCNMA1_ENST00000640182	22	551
UGT1A5	22	551
EPG5	22	551
TRO_ENST00000375041	22	551
NHS_ENST00000617601	22	551
KIAA2026_ENST00000381461	22	551
MCC	22	551
TEX10_ENST00000535814	22	551
SCN2A_ENST00000375427	22	551
TRO_ENST00000420798	22	551
DOCK9_ENST00000442173	22	551
MED24_ENST00000394126	22	551
MYH15	22	551
MYH13_ENST00000621918	22	551
KCNMA1_ENST00000638848	22	551
MCF2L2	22	551
TRO_ENST00000375022	22	551
VPS13A_ENST00000643348	22	551
GREB1_ENST00000234142	22	551
TNC_ENST00000341037	22	551
KCNMA1_ENST00000639406	22	551
PRDM2_ENST00000311066	22	551
FLNB_ENST00000295956	22	551
NCAM2	22	551
NIN_ENST00000530997	22	551
KIAA2026	22	551
KCNMA1_ENST00000457953	22	551
TNC	22	551
GREB1	22	551
NCAM2_ENST00000284894	22	551
SON_ENST00000381679	22	551
ARHGEF6	22	551
EPB41L3_ENST00000400111	22	551
GOLGA4_ENST00000361924	22	551
ENPP3_ENST00000357639	22	551
VPS13A_ENST00000357409	22	551
SLX4	22	551
SCN2A_ENST00000631182	22	551
ARFGEF2	22	551
ANK2_ENST00000264366	22	551
ZMYM3_ENST00000373998	22	551
SCN2A_ENST00000375437	22	551
GNAS	22	734
KCNMA1_ENST00000638606	22	551
C2orf16	22	551
COL4A5_ENST00000361603	22	551
MED24_ENST00000394128	22	551
ADGRB3_ENST00000546190	22	551
CTNNA2_ENST00000466387	22	551
GNAS_ENST00000371102	22	734
KCNMA1_ENST00000638223	22	551
AR_ENST00000504326	22	649
MED24_ENST00000356271	22	551
NALCN	22	551
NRG1_ENST00000519301	22	551
TRPC3_ENST00000513531	22	551
MAP3K15	22	551
FLNB_ENST00000429972	22	551
EPHA3	22	646
CTNNA2_ENST00000629316	22	551
EPB41L3_ENST00000342933	22	551
CDH7	22	551
KCNMA1_ENST00000640969	22	551
NRG1	22	551
CADPS2_ENST00000412584	22	551
NOTCH1	22	650
BIVM-ERCC5_ENST00000639132	22	555
GOLGA4	22	551
COL4A4	22	551
IQGAP2	22	551
KCNMA1_ENST00000404771	22	551
GRIN3A	22	551
PTPRF	22	551
DOCK9_ENST00000448493	22	551
KEAP1	22	752
SCN2A_ENST00000637266	22	551
COL4A5	22	551
DNAJC13	22	551
USP25_ENST00000285679	22	551
KCNMA1_ENST00000638351	22	551
USP25_ENST00000351097	22	551
DOCK5	22	551
IBTK_ENST00000503631	22	551
ZIM2_ENST00000601070	22	551
SLIT3_ENST00000404867	22	551
TRO	22	551
C2orf16_ENST00000447166	22	551
CADPS2_ENST00000313070	22	551
ALS2	21	551
CTNND1	21	551
AKAP12_ENST00000253332	21	551
SYNJ2	21	551
DLG2_ENST00000532653	21	551
MCF2_ENST00000370573	21	551
SORBS2_ENST00000393528	21	551
MYO7B	21	551
KDM5B	21	551
ATP1A2	21	551
PTPRK_ENST00000368215	21	551
RTTN_ENST00000255674	21	551
MYO9B_ENST00000594824	21	551
GNPTAB	21	551
TCF20_ENST00000335626	21	551
CCDC144A	21	551
GON4L_ENST00000437809	21	551
HDLBP_ENST00000427183	21	551
ARHGAP20	21	551
HECW1	21	551
BRCA1_ENST00000491747	21	656
DCC_ENST00000581580	21	551
PTPRK_ENST00000368207	21	551
NTRK1_ENST00000368196	21	646
DLG2	21	551
MYH14_ENST00000601313	21	551
CTNND1_ENST00000527467	21	551
[truncated: 50,414 more rows]
