# Supplementary material for: Genomic mutation features identify distinct BRCA-associated mutation characteristics in endometrioid carcinoma and endometrioid ovarian carcinoma
Source: Aging (Albany NY). 2021 Nov 27;13(22):24686–709. doi: 10.18632/aging.203710 (PMC8660599; doi:10.18632/aging.203710)
Supplement: Supplementary Table 3 [file aging-13-203710-s004.xlsx]

## Sheet: Sheet1
Supplementary Table 3. Mutations of endometrioses.
Gene Name	Sample Name	CDS Mutation	AA Mutation
ARID1A	1449920	c.5953T>C	p.S1985P
ARID1A	1449934	c.6139G>T	p.E2047*
ARID1A	1449920	c.5540dup	p.G1848Wfs*6
ARID1A_ENST00000374152	1449920	c.4804T>C	p.S1602P
ARID1A_ENST00000374152	1449920	c.4391dup	p.G1465Wfs*6
ARID1A_ENST00000374152	1449934	c.4990G>T	p.E1664*
ARID1A_ENST00000430799	1449920	c.4801T>C	p.S1601P
ARID1A_ENST00000430799	1449920	c.4388dup	p.G1464Wfs*6
ARID1A_ENST00000430799	1449934	c.4987G>T	p.E1663*
ARID1A_ENST00000457599	1449920	c.5302T>C	p.S1768P
ARID1A_ENST00000457599	1449920	c.4889dup	p.G1631Wfs*6
ARID1A_ENST00000457599	1449934	c.5488G>T	p.E1830*
CARD11	44474	c.49G>T	p.D17Y
CARD11	13789	c.160G>C	p.E54Q
CTCF	2749290	c.616A>G	p.K206E
CTCF	2749291	c.1118A>T	p.H373L
CTCF_ENST00000264010	2749291	c.1118A>T	p.H373L
CTCF_ENST00000264010	2749290	c.616A>G	p.K206E
CTCF_ENST00000401394	2749291	c.134A>T	p.H45L
CTCF_ENST00000401394	2749290	c.-32-5297A>G	p.?
CTCF_ENST00000642819	2749290	c.616A>G	p.K206E
CTCF_ENST00000642819	2749291	c.1118A>T	p.H373L
CTCF_ENST00000644753	2749290	c.616A>G	p.K206E
CTCF_ENST00000644753	2749291	c.1118A>T	p.H373L
CTCF_ENST00000645306	2749291	c.1118A>T	p.H373L
CTCF_ENST00000645306	2749290	c.616A>G	p.K206E
CTCF_ENST00000645699	2749291	c.1118A>T	p.H373L
CTCF_ENST00000645699	2749290	c.616A>G	p.K206E
CTCF_ENST00000646771	2749290	c.616A>G	p.K206E
CTCF_ENST00000646771	2749291	c.1118A>T	p.H373L
CTNNB1	2478132	c.110C>T	p.S37F
CTNNB1	2478130	c.110C>T	p.S37F
CTNNB1	2478138	c.94G>T	p.D32Y
CTNNB1	2478113	c.110C>T	p.S37F
CTNNB1	2478152	c.94G>A	p.D32N
CTNNB1	2478153	c.94G>A	p.D32N
CTNNB1	2478104	c.98C>G	p.S33C
CTNNB1	2478117	c.97T>C	p.S33P
CTNNB1	2478148	c.105C>T	p.I35=
CTNNB1	2478136	c.105C>T	p.I35=
CTNNB1	2478108	c.110C>G	p.S37C
CTNNB1	2478120	c.110C>G	p.S37C
CTNNB1	2478101	c.110C>G	p.S37C
CTNNB1	2478136	c.110C>G	p.S37C
CTNNB1	1449920	c.110C>G	p.S37C
CTNNB1	2478107	c.110C>G	p.S37C
CTNNB1	2478126	c.122C>T	p.T41I
CTNNB1	2478140	c.122C>T	p.T41I
CTNNB1	2478107	c.101G>A	p.G34E
CTNNB1	2478135	c.95A>T	p.D32V
CTNNB1	2478147	c.109_110delinsCT	p.S37L
CTNNB1	2478141	c.101G>T	p.G34V
CTNNB1	2478145	c.101G>T	p.G34V
CTNNB1_ENST00000349496	2478107	c.101G>A	p.G34E
CTNNB1_ENST00000349496	2478147	c.109_110delinsCT	p.S37L
CTNNB1_ENST00000349496	2478104	c.98C>G	p.S33C
CTNNB1_ENST00000349496	2478113	c.110C>T	p.S37F
CTNNB1_ENST00000349496	2478132	c.110C>T	p.S37F
CTNNB1_ENST00000349496	2478130	c.110C>T	p.S37F
CTNNB1_ENST00000349496	2478117	c.97T>C	p.S33P
CTNNB1_ENST00000349496	2478126	c.122C>T	p.T41I
CTNNB1_ENST00000349496	2478140	c.122C>T	p.T41I
CTNNB1_ENST00000349496	2478101	c.110C>G	p.S37C
CTNNB1_ENST00000349496	2478136	c.110C>G	p.S37C
CTNNB1_ENST00000349496	2478120	c.110C>G	p.S37C
CTNNB1_ENST00000349496	1449920	c.110C>G	p.S37C
CTNNB1_ENST00000349496	2478107	c.110C>G	p.S37C
CTNNB1_ENST00000349496	2478108	c.110C>G	p.S37C
CTNNB1_ENST00000349496	2478138	c.94G>T	p.D32Y
CTNNB1_ENST00000349496	2478141	c.101G>T	p.G34V
CTNNB1_ENST00000349496	2478145	c.101G>T	p.G34V
CTNNB1_ENST00000349496	2478135	c.95A>T	p.D32V
CTNNB1_ENST00000349496	2478136	c.105C>T	p.I35=
CTNNB1_ENST00000349496	2478148	c.105C>T	p.I35=
CTNNB1_ENST00000349496	2478153	c.94G>A	p.D32N
CTNNB1_ENST00000349496	2478152	c.94G>A	p.D32N
CTNNB1_ENST00000396183	2478108	c.110C>G	p.S37C
CTNNB1_ENST00000396183	2478101	c.110C>G	p.S37C
CTNNB1_ENST00000396183	2478136	c.105C>T	p.I35=
CTNNB1_ENST00000396183	2478148	c.105C>T	p.I35=
CTNNB1_ENST00000396183	2478107	c.101G>A	p.G34E
CTNNB1_ENST00000396183	2478135	c.95A>T	p.D32V
CTNNB1_ENST00000396183	2478145	c.101G>T	p.G34V
CTNNB1_ENST00000396183	2478141	c.101G>T	p.G34V
CTNNB1_ENST00000396183	2478140	c.122C>T	p.T41I
CTNNB1_ENST00000396183	2478126	c.122C>T	p.T41I
CTNNB1_ENST00000396183	2478117	c.97T>C	p.S33P
CTNNB1_ENST00000396183	2478130	c.110C>T	p.S37F
CTNNB1_ENST00000396183	2478152	c.94G>A	p.D32N
CTNNB1_ENST00000396183	2478136	c.110C>G	p.S37C
CTNNB1_ENST00000396183	2478120	c.110C>G	p.S37C
CTNNB1_ENST00000396183	1449920	c.110C>G	p.S37C
CTNNB1_ENST00000396183	2478153	c.94G>A	p.D32N
CTNNB1_ENST00000396183	2478147	c.109_110delinsCT	p.S37L
CTNNB1_ENST00000396183	2478132	c.110C>T	p.S37F
CTNNB1_ENST00000396183	2478113	c.110C>T	p.S37F
CTNNB1_ENST00000396183	2478104	c.98C>G	p.S33C
CTNNB1_ENST00000396183	2478138	c.94G>T	p.D32Y
CTNNB1_ENST00000396183	2478107	c.110C>G	p.S37C
CTNNB1_ENST00000396185	2478138	c.94G>T	p.D32Y
CTNNB1_ENST00000396185	2478107	c.101G>A	p.G34E
CTNNB1_ENST00000396185	2478141	c.101G>T	p.G34V
CTNNB1_ENST00000396185	2478145	c.101G>T	p.G34V
CTNNB1_ENST00000396185	2478135	c.95A>T	p.D32V
CTNNB1_ENST00000396185	2478136	c.105C>T	p.I35=
CTNNB1_ENST00000396185	2478126	c.122C>T	p.T41I
CTNNB1_ENST00000396185	2478148	c.105C>T	p.I35=
CTNNB1_ENST00000396185	2478104	c.98C>G	p.S33C
CTNNB1_ENST00000396185	2478107	c.110C>G	p.S37C
CTNNB1_ENST00000396185	2478101	c.110C>G	p.S37C
CTNNB1_ENST00000396185	2478117	c.97T>C	p.S33P
CTNNB1_ENST00000396185	2478120	c.110C>G	p.S37C
CTNNB1_ENST00000396185	2478108	c.110C>G	p.S37C
CTNNB1_ENST00000396185	1449920	c.110C>G	p.S37C
CTNNB1_ENST00000396185	2478136	c.110C>G	p.S37C
CTNNB1_ENST00000396185	2478147	c.109_110delinsCT	p.S37L
CTNNB1_ENST00000396185	2478113	c.110C>T	p.S37F
CTNNB1_ENST00000396185	2478132	c.110C>T	p.S37F
CTNNB1_ENST00000396185	2478130	c.110C>T	p.S37F
CTNNB1_ENST00000396185	2478140	c.122C>T	p.T41I
CTNNB1_ENST00000396185	2478153	c.94G>A	p.D32N
CTNNB1_ENST00000396185	2478152	c.94G>A	p.D32N
CTNNB1_ENST00000405570	2478135	c.95A>T	p.D32V
CTNNB1_ENST00000405570	2478153	c.94G>A	p.D32N
CTNNB1_ENST00000405570	2478147	c.109_110delinsCT	p.S37L
CTNNB1_ENST00000405570	2478107	c.101G>A	p.G34E
CTNNB1_ENST00000405570	2478126	c.122C>T	p.T41I
CTNNB1_ENST00000405570	2478140	c.122C>T	p.T41I
CTNNB1_ENST00000405570	2478136	c.105C>T	p.I35=
CTNNB1_ENST00000405570	2478148	c.105C>T	p.I35=
CTNNB1_ENST00000405570	2478113	c.110C>T	p.S37F
CTNNB1_ENST00000405570	2478130	c.110C>T	p.S37F
CTNNB1_ENST00000405570	2478132	c.110C>T	p.S37F
CTNNB1_ENST00000405570	2478138	c.94G>T	p.D32Y
CTNNB1_ENST00000405570	2478141	c.101G>T	p.G34V
CTNNB1_ENST00000405570	2478145	c.101G>T	p.G34V
CTNNB1_ENST00000405570	2478104	c.98C>G	p.S33C
CTNNB1_ENST00000405570	2478107	c.110C>G	p.S37C
CTNNB1_ENST00000405570	2478136	c.110C>G	p.S37C
CTNNB1_ENST00000405570	1449920	c.110C>G	p.S37C
CTNNB1_ENST00000405570	2478108	c.110C>G	p.S37C
CTNNB1_ENST00000405570	2478101	c.110C>G	p.S37C
CTNNB1_ENST00000405570	2478120	c.110C>G	p.S37C
CTNNB1_ENST00000405570	2478152	c.94G>A	p.D32N
CTNNB1_ENST00000405570	2478117	c.97T>C	p.S33P
CTNNB1_ENST00000431914	2478141	c.101G>T	p.G34V
CTNNB1_ENST00000431914	2478145	c.101G>T	p.G34V
CTNNB1_ENST00000431914	2478104	c.98C>G	p.S33C
CTNNB1_ENST00000431914	2478138	c.94G>T	p.D32Y
CTNNB1_ENST00000431914	2478136	c.105C>T	p.I35=
CTNNB1_ENST00000431914	2478148	c.105C>T	p.I35=
CTNNB1_ENST00000431914	2478140	c.122C>T	p.T41I
CTNNB1_ENST00000431914	2478126	c.122C>T	p.T41I
CTNNB1_ENST00000431914	2478152	c.94G>A	p.D32N
CTNNB1_ENST00000431914	2478153	c.94G>A	p.D32N
CTNNB1_ENST00000431914	2478130	c.110C>T	p.S37F
CTNNB1_ENST00000431914	2478113	c.110C>T	p.S37F
CTNNB1_ENST00000431914	2478132	c.110C>T	p.S37F
CTNNB1_ENST00000431914	2478101	c.110C>G	p.S37C
CTNNB1_ENST00000431914	2478136	c.110C>G	p.S37C
CTNNB1_ENST00000431914	2478120	c.110C>G	p.S37C
CTNNB1_ENST00000431914	2478107	c.110C>G	p.S37C
CTNNB1_ENST00000431914	1449920	c.110C>G	p.S37C
CTNNB1_ENST00000431914	2478108	c.110C>G	p.S37C
CTNNB1_ENST00000431914	2478147	c.109_110delinsCT	p.S37L
CTNNB1_ENST00000431914	2478107	c.101G>A	p.G34E
CTNNB1_ENST00000431914	2478117	c.97T>C	p.S33P
CTNNB1_ENST00000431914	2478135	c.95A>T	p.D32V
CTNNB1_ENST00000433400	2478135	c.95A>T	p.D32V
CTNNB1_ENST00000433400	2478138	c.94G>T	p.D32Y
CTNNB1_ENST00000433400	2478152	c.94G>A	p.D32N
CTNNB1_ENST00000433400	2478153	c.94G>A	p.D32N
CTNNB1_ENST00000433400	2478107	c.110C>G	p.S37C
CTNNB1_ENST00000433400	1449920	c.110C>G	p.S37C
CTNNB1_ENST00000433400	2478120	c.110C>G	p.S37C
CTNNB1_ENST00000433400	2478136	c.110C>G	p.S37C
CTNNB1_ENST00000433400	2478101	c.110C>G	p.S37C
CTNNB1_ENST00000433400	2478108	c.110C>G	p.S37C
CTNNB1_ENST00000433400	2478140	c.122C>T	p.T41I
CTNNB1_ENST00000433400	2478126	c.122C>T	p.T41I
CTNNB1_ENST00000433400	2478104	c.98C>G	p.S33C
CTNNB1_ENST00000433400	2478113	c.110C>T	p.S37F
CTNNB1_ENST00000433400	2478130	c.110C>T	p.S37F
CTNNB1_ENST00000433400	2478132	c.110C>T	p.S37F
CTNNB1_ENST00000433400	2478141	c.101G>T	p.G34V
CTNNB1_ENST00000433400	2478145	c.101G>T	p.G34V
CTNNB1_ENST00000433400	2478136	c.105C>T	p.I35=
CTNNB1_ENST00000433400	2478148	c.105C>T	p.I35=
CTNNB1_ENST00000433400	2478107	c.101G>A	p.G34E
CTNNB1_ENST00000433400	2478117	c.97T>C	p.S33P
CTNNB1_ENST00000433400	2478147	c.109_110delinsCT	p.S37L
CTNNB1_ENST00000441708	2478135	c.95A>T	p.D32V
CTNNB1_ENST00000441708	2478107	c.101G>A	p.G34E
CTNNB1_ENST00000441708	2478120	c.110C>G	p.S37C
CTNNB1_ENST00000441708	2478107	c.110C>G	p.S37C
CTNNB1_ENST00000441708	2478108	c.110C>G	p.S37C
CTNNB1_ENST00000441708	1449920	c.110C>G	p.S37C
CTNNB1_ENST00000441708	2478136	c.110C>G	p.S37C
CTNNB1_ENST00000441708	2478101	c.110C>G	p.S37C
CTNNB1_ENST00000441708	2478145	c.101G>T	p.G34V
CTNNB1_ENST00000441708	2478141	c.101G>T	p.G34V
CTNNB1_ENST00000441708	2478152	c.94G>A	p.D32N
CTNNB1_ENST00000441708	2478140	c.122C>T	p.T41I
CTNNB1_ENST00000441708	2478104	c.98C>G	p.S33C
CTNNB1_ENST00000441708	2478153	c.94G>A	p.D32N
CTNNB1_ENST00000441708	2478117	c.97T>C	p.S33P
CTNNB1_ENST00000441708	2478126	c.122C>T	p.T41I
CTNNB1_ENST00000441708	2478147	c.109_110delinsCT	p.S37L
CTNNB1_ENST00000441708	2478113	c.110C>T	p.S37F
CTNNB1_ENST00000441708	2478130	c.110C>T	p.S37F
CTNNB1_ENST00000441708	2478132	c.110C>T	p.S37F
CTNNB1_ENST00000441708	2478148	c.105C>T	p.I35=
CTNNB1_ENST00000441708	2478136	c.105C>T	p.I35=
CTNNB1_ENST00000441708	2478138	c.94G>T	p.D32Y
CTNNB1_ENST00000450969	2478135	c.95A>T	p.D32V
CTNNB1_ENST00000450969	2478117	c.97T>C	p.S33P
CTNNB1_ENST00000450969	2478153	c.94G>A	p.D32N
CTNNB1_ENST00000450969	2478120	c.110C>G	p.S37C
CTNNB1_ENST00000450969	1449920	c.110C>G	p.S37C
CTNNB1_ENST00000450969	2478108	c.110C>G	p.S37C
CTNNB1_ENST00000450969	2478101	c.110C>G	p.S37C
CTNNB1_ENST00000450969	2478136	c.110C>G	p.S37C
CTNNB1_ENST00000450969	2478107	c.110C>G	p.S37C
CTNNB1_ENST00000450969	2478145	c.101G>T	p.G34V
CTNNB1_ENST00000450969	2478141	c.101G>T	p.G34V
CTNNB1_ENST00000450969	2478107	c.101G>A	p.G34E
CTNNB1_ENST00000450969	2478138	c.94G>T	p.D32Y
CTNNB1_ENST00000450969	2478136	c.105C>T	p.I35=
CTNNB1_ENST00000450969	2478132	c.110C>T	p.S37F
CTNNB1_ENST00000450969	2478113	c.110C>T	p.S37F
CTNNB1_ENST00000450969	2478148	c.105C>T	p.I35=
CTNNB1_ENST00000450969	2478104	c.98C>G	p.S33C
CTNNB1_ENST00000450969	2478130	c.110C>T	p.S37F
CTNNB1_ENST00000450969	2478152	c.94G>A	p.D32N
CTNNB1_ENST00000450969	2478126	c.122C>T	p.T41I
CTNNB1_ENST00000450969	2478140	c.122C>T	p.T41I
CTNNB1_ENST00000450969	2478147	c.109_110delinsCT	p.S37L
CTNNB1_ENST00000453024	2478117	c.76T>C	p.S26P
CTNNB1_ENST00000453024	2478148	c.84C>T	p.I28=
CTNNB1_ENST00000453024	2478147	c.88_89delinsCT	p.S30L
CTNNB1_ENST00000453024	2478135	c.74A>T	p.D25V
CTNNB1_ENST00000453024	2478107	c.80G>A	p.G27E
CTNNB1_ENST00000453024	2478153	c.73G>A	p.D25N
CTNNB1_ENST00000453024	2478138	c.73G>T	p.D25Y
CTNNB1_ENST00000453024	2478152	c.73G>A	p.D25N
CTNNB1_ENST00000453024	2478132	c.89C>T	p.S30F
CTNNB1_ENST00000453024	2478113	c.89C>T	p.S30F
CTNNB1_ENST00000453024	2478130	c.89C>T	p.S30F
CTNNB1_ENST00000453024	2478145	c.80G>T	p.G27V
CTNNB1_ENST00000453024	2478141	c.80G>T	p.G27V
CTNNB1_ENST00000453024	2478107	c.89C>G	p.S30C
CTNNB1_ENST00000453024	2478136	c.89C>G	p.S30C
CTNNB1_ENST00000453024	2478101	c.89C>G	p.S30C
CTNNB1_ENST00000453024	2478120	c.89C>G	p.S30C
CTNNB1_ENST00000453024	1449920	c.89C>G	p.S30C
CTNNB1_ENST00000453024	2478108	c.89C>G	p.S30C
CTNNB1_ENST00000453024	2478136	c.84C>T	p.I28=
CTNNB1_ENST00000453024	2478126	c.101C>T	p.T34I
CTNNB1_ENST00000453024	2478140	c.101C>T	p.T34I
CTNNB1_ENST00000453024	2478104	c.77C>G	p.S26C
CTNNB1_ENST00000642248	2478138	c.94G>T	p.D32Y
CTNNB1_ENST00000642248	2478135	c.95A>T	p.D32V
CTNNB1_ENST00000642248	2478140	c.122C>T	p.T41I
CTNNB1_ENST00000642248	2478126	c.122C>T	p.T41I
CTNNB1_ENST00000642248	2478107	c.101G>A	p.G34E
CTNNB1_ENST00000642248	2478113	c.110C>T	p.S37F
CTNNB1_ENST00000642248	2478132	c.110C>T	p.S37F
CTNNB1_ENST00000642248	2478130	c.110C>T	p.S37F
CTNNB1_ENST00000642248	2478136	c.110C>G	p.S37C
CTNNB1_ENST00000642248	2478101	c.110C>G	p.S37C
CTNNB1_ENST00000642248	2478104	c.98C>G	p.S33C
CTNNB1_ENST00000642248	2478145	c.101G>T	p.G34V
CTNNB1_ENST00000642248	2478141	c.101G>T	p.G34V
CTNNB1_ENST00000642248	2478152	c.94G>A	p.D32N
CTNNB1_ENST00000642248	2478153	c.94G>A	p.D32N
CTNNB1_ENST00000642248	2478117	c.97T>C	p.S33P
CTNNB1_ENST00000642248	2478136	c.105C>T	p.I35=
CTNNB1_ENST00000642248	2478148	c.105C>T	p.I35=
CTNNB1_ENST00000642248	2478147	c.109_110delinsCT	p.S37L
CTNNB1_ENST00000642248	2478120	c.110C>G	p.S37C
CTNNB1_ENST00000642248	2478108	c.110C>G	p.S37C
CTNNB1_ENST00000642248	1449920	c.110C>G	p.S37C
CTNNB1_ENST00000642248	2478107	c.110C>G	p.S37C
CTNNB1_ENST00000642315	2478152	c.94G>A	p.D32N
CTNNB1_ENST00000642315	2478120	c.110C>G	p.S37C
CTNNB1_ENST00000642315	2478153	c.94G>A	p.D32N
CTNNB1_ENST00000642315	2478136	c.110C>G	p.S37C
CTNNB1_ENST00000642315	2478107	c.110C>G	p.S37C
CTNNB1_ENST00000642315	2478108	c.110C>G	p.S37C
CTNNB1_ENST00000642315	1449920	c.110C>G	p.S37C
CTNNB1_ENST00000642315	2478101	c.110C>G	p.S37C
CTNNB1_ENST00000642315	2478117	c.97T>C	p.S33P
CTNNB1_ENST00000642315	2478104	c.98C>G	p.S33C
CTNNB1_ENST00000642315	2478107	c.101G>A	p.G34E
CTNNB1_ENST00000642315	2478145	c.101G>T	p.G34V
CTNNB1_ENST00000642315	2478141	c.101G>T	p.G34V
CTNNB1_ENST00000642315	2478130	c.110C>T	p.S37F
CTNNB1_ENST00000642315	2478113	c.110C>T	p.S37F
CTNNB1_ENST00000642315	2478132	c.110C>T	p.S37F
CTNNB1_ENST00000642315	2478136	c.105C>T	p.I35=
CTNNB1_ENST00000642315	2478148	c.105C>T	p.I35=
CTNNB1_ENST00000642315	2478138	c.94G>T	p.D32Y
CTNNB1_ENST00000642315	2478126	c.122C>T	p.T41I
CTNNB1_ENST00000642315	2478140	c.122C>T	p.T41I
CTNNB1_ENST00000642315	2478135	c.95A>T	p.D32V
CTNNB1_ENST00000642315	2478147	c.109_110delinsCT	p.S37L
CTNNB1_ENST00000642426	2478140	c.122C>T	p.T41I
CTNNB1_ENST00000642426	2478148	c.105C>T	p.I35=
CTNNB1_ENST00000642426	2478126	c.122C>T	p.T41I
CTNNB1_ENST00000642426	2478138	c.94G>T	p.D32Y
CTNNB1_ENST00000642426	2478147	c.109_110delinsCT	p.S37L
CTNNB1_ENST00000642426	1449920	c.110C>G	p.S37C
CTNNB1_ENST00000642426	2478136	c.110C>G	p.S37C
CTNNB1_ENST00000642426	2478107	c.110C>G	p.S37C
CTNNB1_ENST00000642426	2478120	c.110C>G	p.S37C
CTNNB1_ENST00000642426	2478108	c.110C>G	p.S37C
CTNNB1_ENST00000642426	2478101	c.110C>G	p.S37C
CTNNB1_ENST00000642426	2478104	c.98C>G	p.S33C
CTNNB1_ENST00000642426	2478107	c.101G>A	p.G34E
CTNNB1_ENST00000642426	2478117	c.97T>C	p.S33P
CTNNB1_ENST00000642426	2478130	c.110C>T	p.S37F
CTNNB1_ENST00000642426	2478152	c.94G>A	p.D32N
CTNNB1_ENST00000642426	2478135	c.95A>T	p.D32V
CTNNB1_ENST00000642426	2478132	c.110C>T	p.S37F
CTNNB1_ENST00000642426	2478113	c.110C>T	p.S37F
CTNNB1_ENST00000642426	2478145	c.101G>T	p.G34V
CTNNB1_ENST00000642426	2478141	c.101G>T	p.G34V
CTNNB1_ENST00000642426	2478136	c.105C>T	p.I35=
CTNNB1_ENST00000642426	2478153	c.94G>A	p.D32N
CTNNB1_ENST00000642836	2478101	c.89C>G	p.S30C
CTNNB1_ENST00000642836	2478107	c.89C>G	p.S30C
CTNNB1_ENST00000642836	2478120	c.89C>G	p.S30C
CTNNB1_ENST00000642836	2478136	c.89C>G	p.S30C
CTNNB1_ENST00000642836	2478108	c.89C>G	p.S30C
CTNNB1_ENST00000642836	1449920	c.89C>G	p.S30C
CTNNB1_ENST00000642836	2478152	c.73G>A	p.D25N
CTNNB1_ENST00000642836	2478153	c.73G>A	p.D25N
CTNNB1_ENST00000642836	2478107	c.80G>A	p.G27E
CTNNB1_ENST00000642836	2478126	c.101C>T	p.T34I
CTNNB1_ENST00000642836	2478140	c.101C>T	p.T34I
CTNNB1_ENST00000642836	2478117	c.76T>C	p.S26P
CTNNB1_ENST00000642836	2478138	c.73G>T	p.D25Y
CTNNB1_ENST00000642836	2478104	c.77C>G	p.S26C
CTNNB1_ENST00000642836	2478147	c.88_89delinsCT	p.S30L
CTNNB1_ENST00000642836	2478148	c.84C>T	p.I28=
CTNNB1_ENST00000642836	2478136	c.84C>T	p.I28=
CTNNB1_ENST00000642836	2478113	c.89C>T	p.S30F
CTNNB1_ENST00000642836	2478130	c.89C>T	p.S30F
CTNNB1_ENST00000642836	2478132	c.89C>T	p.S30F
CTNNB1_ENST00000642836	2478135	c.74A>T	p.D25V
CTNNB1_ENST00000642836	2478141	c.80G>T	p.G27V
CTNNB1_ENST00000642836	2478145	c.80G>T	p.G27V
CTNNB1_ENST00000642886	2478147	c.109_110delinsCT	p.S37L
CTNNB1_ENST00000642886	2478117	c.97T>C	p.S33P
CTNNB1_ENST00000642886	2478136	c.105C>T	p.I35=
CTNNB1_ENST00000642886	2478148	c.105C>T	p.I35=
CTNNB1_ENST00000642886	2478108	c.110C>G	p.S37C
CTNNB1_ENST00000642886	2478101	c.110C>G	p.S37C
CTNNB1_ENST00000642886	2478107	c.110C>G	p.S37C
CTNNB1_ENST00000642886	2478107	c.101G>A	p.G34E
CTNNB1_ENST00000642886	2478153	c.94G>A	p.D32N
CTNNB1_ENST00000642886	2478152	c.94G>A	p.D32N
CTNNB1_ENST00000642886	2478136	c.110C>G	p.S37C
CTNNB1_ENST00000642886	1449920	c.110C>G	p.S37C
CTNNB1_ENST00000642886	2478120	c.110C>G	p.S37C
CTNNB1_ENST00000642886	2478145	c.101G>T	p.G34V
CTNNB1_ENST00000642886	2478141	c.101G>T	p.G34V
CTNNB1_ENST00000642886	2478132	c.110C>T	p.S37F
CTNNB1_ENST00000642886	2478113	c.110C>T	p.S37F
CTNNB1_ENST00000642886	2478130	c.110C>T	p.S37F
CTNNB1_ENST00000642886	2478104	c.98C>G	p.S33C
CTNNB1_ENST00000642886	2478126	c.122C>T	p.T41I
CTNNB1_ENST00000642886	2478140	c.122C>T	p.T41I
CTNNB1_ENST00000642886	2478135	c.95A>T	p.D32V
CTNNB1_ENST00000642886	2478138	c.94G>T	p.D32Y
CTNNB1_ENST00000642986	2478147	c.88_89delinsCT	p.S30L
CTNNB1_ENST00000642986	2478130	c.89C>T	p.S30F
CTNNB1_ENST00000642986	2478152	c.73G>A	p.D25N
CTNNB1_ENST00000642986	2478126	c.101C>T	p.T34I
CTNNB1_ENST00000642986	2478107	c.80G>A	p.G27E
CTNNB1_ENST00000642986	2478132	c.89C>T	p.S30F
CTNNB1_ENST00000642986	2478113	c.89C>T	p.S30F
CTNNB1_ENST00000642986	2478117	c.76T>C	p.S26P
CTNNB1_ENST00000642986	2478145	c.80G>T	p.G27V
CTNNB1_ENST00000642986	2478141	c.80G>T	p.G27V
CTNNB1_ENST00000642986	1449920	c.89C>G	p.S30C
CTNNB1_ENST00000642986	2478108	c.89C>G	p.S30C
CTNNB1_ENST00000642986	2478136	c.89C>G	p.S30C
CTNNB1_ENST00000642986	2478120	c.89C>G	p.S30C
CTNNB1_ENST00000642986	2478101	c.89C>G	p.S30C
CTNNB1_ENST00000642986	2478107	c.89C>G	p.S30C
CTNNB1_ENST00000642986	2478140	c.101C>T	p.T34I
CTNNB1_ENST00000642986	2478153	c.73G>A	p.D25N
CTNNB1_ENST00000642986	2478148	c.84C>T	p.I28=
CTNNB1_ENST00000642986	2478136	c.84C>T	p.I28=
CTNNB1_ENST00000642986	2478138	c.73G>T	p.D25Y
CTNNB1_ENST00000642986	2478135	c.74A>T	p.D25V
CTNNB1_ENST00000642986	2478104	c.77C>G	p.S26C
CTNNB1_ENST00000642992	2478152	c.94G>A	p.D32N
CTNNB1_ENST00000642992	2478108	c.110C>G	p.S37C
CTNNB1_ENST00000642992	2478104	c.98C>G	p.S33C
CTNNB1_ENST00000642992	2478135	c.95A>T	p.D32V
CTNNB1_ENST00000642992	2478126	c.122C>T	p.T41I
CTNNB1_ENST00000642992	2478145	c.101G>T	p.G34V
CTNNB1_ENST00000642992	2478136	c.105C>T	p.I35=
CTNNB1_ENST00000642992	2478148	c.105C>T	p.I35=
CTNNB1_ENST00000642992	2478141	c.101G>T	p.G34V
CTNNB1_ENST00000642992	2478130	c.110C>T	p.S37F
CTNNB1_ENST00000642992	2478107	c.101G>A	p.G34E
CTNNB1_ENST00000642992	2478147	c.109_110delinsCT	p.S37L
CTNNB1_ENST00000642992	2478132	c.110C>T	p.S37F
CTNNB1_ENST00000642992	2478117	c.97T>C	p.S33P
CTNNB1_ENST00000642992	2478113	c.110C>T	p.S37F
CTNNB1_ENST00000642992	2478138	c.94G>T	p.D32Y
CTNNB1_ENST00000642992	2478140	c.122C>T	p.T41I
CTNNB1_ENST00000642992	2478120	c.110C>G	p.S37C
CTNNB1_ENST00000642992	2478107	c.110C>G	p.S37C
CTNNB1_ENST00000642992	2478101	c.110C>G	p.S37C
CTNNB1_ENST00000642992	1449920	c.110C>G	p.S37C
CTNNB1_ENST00000642992	2478136	c.110C>G	p.S37C
CTNNB1_ENST00000642992	2478153	c.94G>A	p.D32N
CTNNB1_ENST00000643031	2478107	c.101G>A	p.G34E
CTNNB1_ENST00000643031	2478152	c.94G>A	p.D32N
CTNNB1_ENST00000643031	2478145	c.101G>T	p.G34V
CTNNB1_ENST00000643031	2478117	c.97T>C	p.S33P
CTNNB1_ENST00000643031	2478108	c.110C>G	p.S37C
CTNNB1_ENST00000643031	1449920	c.110C>G	p.S37C
CTNNB1_ENST00000643031	2478140	c.122C>T	p.T41I
CTNNB1_ENST00000643031	2478120	c.110C>G	p.S37C
CTNNB1_ENST00000643031	2478135	c.95A>T	p.D32V
CTNNB1_ENST00000643031	2478107	c.110C>G	p.S37C
CTNNB1_ENST00000643031	2478101	c.110C>G	p.S37C
CTNNB1_ENST00000643031	2478126	c.122C>T	p.T41I
CTNNB1_ENST00000643031	2478136	c.110C>G	p.S37C
CTNNB1_ENST00000643031	2478147	c.109_110delinsCT	p.S37L
CTNNB1_ENST00000643031	2478138	c.94G>T	p.D32Y
CTNNB1_ENST00000643031	2478148	c.105C>T	p.I35=
CTNNB1_ENST00000643031	2478136	c.105C>T	p.I35=
CTNNB1_ENST00000643031	2478104	c.98C>G	p.S33C
CTNNB1_ENST00000643031	2478132	c.110C>T	p.S37F
CTNNB1_ENST00000643031	2478113	c.110C>T	p.S37F
CTNNB1_ENST00000643031	2478130	c.110C>T	p.S37F
CTNNB1_ENST00000643031	2478153	c.94G>A	p.D32N
CTNNB1_ENST00000643031	2478141	c.101G>T	p.G34V
CTNNB1_ENST00000643297	2478147	c.109_110delinsCT	p.S37L
CTNNB1_ENST00000643297	2478136	c.105C>T	p.I35=
CTNNB1_ENST00000643297	2478148	c.105C>T	p.I35=
CTNNB1_ENST00000643297	2478145	c.101G>T	p.G34V
CTNNB1_ENST00000643297	2478141	c.101G>T	p.G34V
CTNNB1_ENST00000643297	2478138	c.94G>T	p.D32Y
CTNNB1_ENST00000643297	2478113	c.110C>T	p.S37F
CTNNB1_ENST00000643297	2478130	c.110C>T	p.S37F
CTNNB1_ENST00000643297	2478132	c.110C>T	p.S37F
CTNNB1_ENST00000643297	2478140	c.122C>T	p.T41I
CTNNB1_ENST00000643297	2478126	c.122C>T	p.T41I
CTNNB1_ENST00000643297	2478153	c.94G>A	p.D32N
CTNNB1_ENST00000643297	2478136	c.110C>G	p.S37C
CTNNB1_ENST00000643297	2478108	c.110C>G	p.S37C
CTNNB1_ENST00000643297	2478101	c.110C>G	p.S37C
CTNNB1_ENST00000643297	1449920	c.110C>G	p.S37C
CTNNB1_ENST00000643297	2478152	c.94G>A	p.D32N
CTNNB1_ENST00000643297	2478107	c.110C>G	p.S37C
CTNNB1_ENST00000643297	2478120	c.110C>G	p.S37C
CTNNB1_ENST00000643297	2478107	c.101G>A	p.G34E
CTNNB1_ENST00000643297	2478117	c.97T>C	p.S33P
CTNNB1_ENST00000643297	2478135	c.95A>T	p.D32V
CTNNB1_ENST00000643297	2478104	c.98C>G	p.S33C
CTNNB1_ENST00000643541	2478147	c.109_110delinsCT	p.S37L
CTNNB1_ENST00000643541	2478107	c.101G>A	p.G34E
CTNNB1_ENST00000643541	2478126	c.122C>T	p.T41I
CTNNB1_ENST00000643541	2478104	c.98C>G	p.S33C
CTNNB1_ENST00000643541	2478101	c.110C>G	p.S37C
CTNNB1_ENST00000643541	2478108	c.110C>G	p.S37C
CTNNB1_ENST00000643541	1449920	c.110C>G	p.S37C
CTNNB1_ENST00000643541	2478136	c.110C>G	p.S37C
CTNNB1_ENST00000643541	2478120	c.110C>G	p.S37C
CTNNB1_ENST00000643541	2478107	c.110C>G	p.S37C
CTNNB1_ENST00000643541	2478117	c.97T>C	p.S33P
CTNNB1_ENST00000643541	2478130	c.110C>T	p.S37F
CTNNB1_ENST00000643541	2478141	c.101G>T	p.G34V
CTNNB1_ENST00000643541	2478145	c.101G>T	p.G34V
CTNNB1_ENST00000643541	2478132	c.110C>T	p.S37F
CTNNB1_ENST00000643541	2478138	c.94G>T	p.D32Y
CTNNB1_ENST00000643541	2478135	c.95A>T	p.D32V
CTNNB1_ENST00000643541	2478113	c.110C>T	p.S37F
CTNNB1_ENST00000643541	2478136	c.105C>T	p.I35=
CTNNB1_ENST00000643541	2478148	c.105C>T	p.I35=
CTNNB1_ENST00000643541	2478153	c.94G>A	p.D32N
CTNNB1_ENST00000643541	2478152	c.94G>A	p.D32N
CTNNB1_ENST00000643541	2478140	c.122C>T	p.T41I
CTNNB1_ENST00000643977	2478117	c.97T>C	p.S33P
CTNNB1_ENST00000643977	2478141	c.101G>T	p.G34V
CTNNB1_ENST00000643977	2478145	c.101G>T	p.G34V
CTNNB1_ENST00000643977	2478152	c.94G>A	p.D32N
CTNNB1_ENST00000643977	2478153	c.94G>A	p.D32N
CTNNB1_ENST00000643977	2478107	c.101G>A	p.G34E
CTNNB1_ENST00000643977	2478113	c.110C>T	p.S37F
CTNNB1_ENST00000643977	2478132	c.110C>T	p.S37F
CTNNB1_ENST00000643977	2478130	c.110C>T	p.S37F
CTNNB1_ENST00000643977	2478147	c.109_110delinsCT	p.S37L
CTNNB1_ENST00000643977	2478104	c.98C>G	p.S33C
CTNNB1_ENST00000643977	2478138	c.94G>T	p.D32Y
CTNNB1_ENST00000643977	2478135	c.95A>T	p.D32V
CTNNB1_ENST00000643977	2478148	c.105C>T	p.I35=
CTNNB1_ENST00000643977	2478136	c.105C>T	p.I35=
CTNNB1_ENST00000643977	2478108	c.110C>G	p.S37C
CTNNB1_ENST00000643977	2478107	c.110C>G	p.S37C
CTNNB1_ENST00000643977	1449920	c.110C>G	p.S37C
CTNNB1_ENST00000643977	2478136	c.110C>G	p.S37C
CTNNB1_ENST00000643977	2478126	c.122C>T	p.T41I
CTNNB1_ENST00000643977	2478101	c.110C>G	p.S37C
CTNNB1_ENST00000643977	2478140	c.122C>T	p.T41I
CTNNB1_ENST00000643977	2478120	c.110C>G	p.S37C
CTNNB1_ENST00000643992	2478107	c.101G>A	p.G34E
CTNNB1_ENST00000643992	2478132	c.110C>T	p.S37F
CTNNB1_ENST00000643992	2478152	c.94G>A	p.D32N
CTNNB1_ENST00000643992	2478135	c.95A>T	p.D32V
CTNNB1_ENST00000643992	2478145	c.101G>T	p.G34V
CTNNB1_ENST00000643992	2478141	c.101G>T	p.G34V
CTNNB1_ENST00000643992	2478136	c.105C>T	p.I35=
CTNNB1_ENST00000643992	2478148	c.105C>T	p.I35=
CTNNB1_ENST00000643992	2478117	c.97T>C	p.S33P
CTNNB1_ENST00000643992	2478104	c.98C>G	p.S33C
CTNNB1_ENST00000643992	2478107	c.110C>G	p.S37C
CTNNB1_ENST00000643992	2478140	c.122C>T	p.T41I
CTNNB1_ENST00000643992	2478120	c.110C>G	p.S37C
CTNNB1_ENST00000643992	2478101	c.110C>G	p.S37C
CTNNB1_ENST00000643992	2478108	c.110C>G	p.S37C
CTNNB1_ENST00000643992	1449920	c.110C>G	p.S37C
CTNNB1_ENST00000643992	2478136	c.110C>G	p.S37C
CTNNB1_ENST00000643992	2478126	c.122C>T	p.T41I
CTNNB1_ENST00000643992	2478138	c.94G>T	p.D32Y
CTNNB1_ENST00000643992	2478147	c.109_110delinsCT	p.S37L
CTNNB1_ENST00000643992	2478130	c.110C>T	p.S37F
CTNNB1_ENST00000643992	2478113	c.110C>T	p.S37F
CTNNB1_ENST00000643992	2478153	c.94G>A	p.D32N
CTNNB1_ENST00000644138	2478148	c.105C>T	p.I35=
CTNNB1_ENST00000644138	2478141	c.101G>T	p.G34V
CTNNB1_ENST00000644138	2478132	c.110C>T	p.S37F
CTNNB1_ENST00000644138	2478130	c.110C>T	p.S37F
CTNNB1_ENST00000644138	2478113	c.110C>T	p.S37F
CTNNB1_ENST00000644138	2478138	c.94G>T	p.D32Y
CTNNB1_ENST00000644138	2478153	c.94G>A	p.D32N
CTNNB1_ENST00000644138	2478140	c.122C>T	p.T41I
CTNNB1_ENST00000644138	2478126	c.122C>T	p.T41I
CTNNB1_ENST00000644138	2478152	c.94G>A	p.D32N
CTNNB1_ENST00000644138	2478107	c.110C>G	p.S37C
CTNNB1_ENST00000644138	2478108	c.110C>G	p.S37C
CTNNB1_ENST00000644138	2478136	c.110C>G	p.S37C
CTNNB1_ENST00000644138	2478120	c.110C>G	p.S37C
CTNNB1_ENST00000644138	1449920	c.110C>G	p.S37C
CTNNB1_ENST00000644138	2478101	c.110C>G	p.S37C
CTNNB1_ENST00000644138	2478107	c.101G>A	p.G34E
CTNNB1_ENST00000644138	2478147	c.109_110delinsCT	p.S37L
CTNNB1_ENST00000644138	2478104	c.98C>G	p.S33C
CTNNB1_ENST00000644138	2478135	c.95A>T	p.D32V
CTNNB1_ENST00000644138	2478145	c.101G>T	p.G34V
CTNNB1_ENST00000644138	2478117	c.97T>C	p.S33P
CTNNB1_ENST00000644138	2478136	c.105C>T	p.I35=
CTNNB1_ENST00000644524	2478145	c.80G>T	p.G27V
CTNNB1_ENST00000644524	2478135	c.74A>T	p.D25V
CTNNB1_ENST00000644524	2478132	c.89C>T	p.S30F
CTNNB1_ENST00000644524	2478130	c.89C>T	p.S30F
CTNNB1_ENST00000644524	2478113	c.89C>T	p.S30F
CTNNB1_ENST00000644524	2478147	c.88_89delinsCT	p.S30L
CTNNB1_ENST00000644524	2478104	c.77C>G	p.S26C
CTNNB1_ENST00000644524	2478117	c.76T>C	p.S26P
CTNNB1_ENST00000644524	2478148	c.84C>T	p.I28=
CTNNB1_ENST00000644524	2478136	c.84C>T	p.I28=
CTNNB1_ENST00000644524	2478140	c.101C>T	p.T34I
CTNNB1_ENST00000644524	2478126	c.101C>T	p.T34I
CTNNB1_ENST00000644524	1449920	c.89C>G	p.S30C
CTNNB1_ENST00000644524	2478101	c.89C>G	p.S30C
CTNNB1_ENST00000644524	2478136	c.89C>G	p.S30C
CTNNB1_ENST00000644524	2478108	c.89C>G	p.S30C
CTNNB1_ENST00000644524	2478107	c.89C>G	p.S30C
CTNNB1_ENST00000644524	2478120	c.89C>G	p.S30C
CTNNB1_ENST00000644524	2478107	c.80G>A	p.G27E
CTNNB1_ENST00000644524	2478152	c.73G>A	p.D25N
CTNNB1_ENST00000644524	2478138	c.73G>T	p.D25Y
CTNNB1_ENST00000644524	2478153	c.73G>A	p.D25N
CTNNB1_ENST00000644524	2478141	c.80G>T	p.G27V
CTNNB1_ENST00000644678	2478117	c.76T>C	p.S26P
CTNNB1_ENST00000644678	2478136	c.89C>G	p.S30C
CTNNB1_ENST00000644678	2478130	c.89C>T	p.S30F
CTNNB1_ENST00000644678	2478113	c.89C>T	p.S30F
CTNNB1_ENST00000644678	2478140	c.101C>T	p.T34I
CTNNB1_ENST00000644678	2478126	c.101C>T	p.T34I
CTNNB1_ENST00000644678	2478138	c.73G>T	p.D25Y
CTNNB1_ENST00000644678	2478135	c.74A>T	p.D25V
CTNNB1_ENST00000644678	2478104	c.77C>G	p.S26C
CTNNB1_ENST00000644678	2478141	c.80G>T	p.G27V
CTNNB1_ENST00000644678	2478145	c.80G>T	p.G27V
CTNNB1_ENST00000644678	2478148	c.84C>T	p.I28=
CTNNB1_ENST00000644678	2478136	c.84C>T	p.I28=
CTNNB1_ENST00000644678	2478153	c.73G>A	p.D25N
CTNNB1_ENST00000644678	2478152	c.73G>A	p.D25N
CTNNB1_ENST00000644678	2478147	c.88_89delinsCT	p.S30L
CTNNB1_ENST00000644678	2478107	c.80G>A	p.G27E
CTNNB1_ENST00000644678	2478101	c.89C>G	p.S30C
CTNNB1_ENST00000644678	2478107	c.89C>G	p.S30C
CTNNB1_ENST00000644678	1449920	c.89C>G	p.S30C
CTNNB1_ENST00000644678	2478120	c.89C>G	p.S30C
CTNNB1_ENST00000644678	2478108	c.89C>G	p.S30C
CTNNB1_ENST00000644678	2478132	c.89C>T	p.S30F
CTNNB1_ENST00000644867	2478140	c.122C>T	p.T41I
CTNNB1_ENST00000644867	2478126	c.122C>T	p.T41I
CTNNB1_ENST00000644867	2478130	c.110C>T	p.S37F
CTNNB1_ENST00000644867	2478132	c.110C>T	p.S37F
CTNNB1_ENST00000644867	2478113	c.110C>T	p.S37F
CTNNB1_ENST00000644867	2478145	c.101G>T	p.G34V
CTNNB1_ENST00000644867	2478141	c.101G>T	p.G34V
CTNNB1_ENST00000644867	2478104	c.98C>G	p.S33C
CTNNB1_ENST00000644867	2478153	c.94G>A	p.D32N
CTNNB1_ENST00000644867	2478152	c.94G>A	p.D32N
CTNNB1_ENST00000644867	2478117	c.97T>C	p.S33P
CTNNB1_ENST00000644867	2478107	c.110C>G	p.S37C
CTNNB1_ENST00000644867	2478108	c.110C>G	p.S37C
CTNNB1_ENST00000644867	2478136	c.110C>G	p.S37C
CTNNB1_ENST00000644867	2478101	c.110C>G	p.S37C
CTNNB1_ENST00000644867	2478120	c.110C>G	p.S37C
CTNNB1_ENST00000644867	1449920	c.110C>G	p.S37C
CTNNB1_ENST00000644867	2478138	c.94G>T	p.D32Y
CTNNB1_ENST00000644867	2478107	c.101G>A	p.G34E
CTNNB1_ENST00000644867	2478147	c.109_110delinsCT	p.S37L
CTNNB1_ENST00000644867	2478135	c.95A>T	p.D32V
CTNNB1_ENST00000644867	2478148	c.105C>T	p.I35=
CTNNB1_ENST00000644867	2478136	c.105C>T	p.I35=
CTNNB1_ENST00000644873	2478135	c.95A>T	p.D32V
CTNNB1_ENST00000644873	2478120	c.110C>G	p.S37C
CTNNB1_ENST00000644873	2478147	c.109_110delinsCT	p.S37L
CTNNB1_ENST00000644873	2478130	c.110C>T	p.S37F
CTNNB1_ENST00000644873	2478132	c.110C>T	p.S37F
CTNNB1_ENST00000644873	2478113	c.110C>T	p.S37F
CTNNB1_ENST00000644873	2478140	c.122C>T	p.T41I
CTNNB1_ENST00000644873	2478126	c.122C>T	p.T41I
CTNNB1_ENST00000644873	2478138	c.94G>T	p.D32Y
CTNNB1_ENST00000644873	2478145	c.101G>T	p.G34V
CTNNB1_ENST00000644873	2478141	c.101G>T	p.G34V
CTNNB1_ENST00000644873	2478107	c.101G>A	p.G34E
CTNNB1_ENST00000644873	2478136	c.105C>T	p.I35=
CTNNB1_ENST00000644873	2478148	c.105C>T	p.I35=
CTNNB1_ENST00000644873	2478117	c.97T>C	p.S33P
CTNNB1_ENST00000644873	2478153	c.94G>A	p.D32N
CTNNB1_ENST00000644873	2478152	c.94G>A	p.D32N
CTNNB1_ENST00000644873	1449920	c.110C>G	p.S37C
CTNNB1_ENST00000644873	2478108	c.110C>G	p.S37C
CTNNB1_ENST00000644873	2478136	c.110C>G	p.S37C
CTNNB1_ENST00000644873	2478101	c.110C>G	p.S37C
CTNNB1_ENST00000644873	2478107	c.110C>G	p.S37C
CTNNB1_ENST00000644873	2478104	c.98C>G	p.S33C
CTNNB1_ENST00000645210	2478104	c.98C>G	p.S33C
CTNNB1_ENST00000645210	2478107	c.101G>A	p.G34E
CTNNB1_ENST00000645210	2478140	c.122C>T	p.T41I
CTNNB1_ENST00000645210	2478126	c.122C>T	p.T41I
CTNNB1_ENST00000645210	2478130	c.110C>T	p.S37F
CTNNB1_ENST00000645210	2478113	c.110C>T	p.S37F
CTNNB1_ENST00000645210	2478132	c.110C>T	p.S37F
CTNNB1_ENST00000645210	2478153	c.94G>A	p.D32N
CTNNB1_ENST00000645210	2478152	c.94G>A	p.D32N
CTNNB1_ENST00000645210	2478117	c.97T>C	p.S33P
CTNNB1_ENST00000645210	2478135	c.95A>T	p.D32V
CTNNB1_ENST00000645210	2478141	c.101G>T	p.G34V
CTNNB1_ENST00000645210	2478145	c.101G>T	p.G34V
CTNNB1_ENST00000645210	2478138	c.94G>T	p.D32Y
CTNNB1_ENST00000645210	2478101	c.110C>G	p.S37C
CTNNB1_ENST00000645210	2478120	c.110C>G	p.S37C
CTNNB1_ENST00000645210	2478136	c.110C>G	p.S37C
CTNNB1_ENST00000645210	2478107	c.110C>G	p.S37C
CTNNB1_ENST00000645210	1449920	c.110C>G	p.S37C
CTNNB1_ENST00000645210	2478108	c.110C>G	p.S37C
CTNNB1_ENST00000645210	2478148	c.105C>T	p.I35=
CTNNB1_ENST00000645210	2478136	c.105C>T	p.I35=
CTNNB1_ENST00000645210	2478147	c.109_110delinsCT	p.S37L
CTNNB1_ENST00000645276	2478145	c.101G>T	p.G34V
CTNNB1_ENST00000645276	2478141	c.101G>T	p.G34V
CTNNB1_ENST00000645276	2478140	c.122C>T	p.T41I
CTNNB1_ENST00000645276	2478126	c.122C>T	p.T41I
CTNNB1_ENST00000645276	2478130	c.110C>T	p.S37F
CTNNB1_ENST00000645276	2478113	c.110C>T	p.S37F
CTNNB1_ENST00000645276	2478132	c.110C>T	p.S37F
CTNNB1_ENST00000645276	2478104	c.98C>G	p.S33C
CTNNB1_ENST00000645276	2478152	c.94G>A	p.D32N
CTNNB1_ENST00000645276	2478153	c.94G>A	p.D32N
CTNNB1_ENST00000645276	2478136	c.110C>G	p.S37C
CTNNB1_ENST00000645276	1449920	c.110C>G	p.S37C
CTNNB1_ENST00000645276	2478101	c.110C>G	p.S37C
CTNNB1_ENST00000645276	2478108	c.110C>G	p.S37C
CTNNB1_ENST00000645276	2478107	c.110C>G	p.S37C
CTNNB1_ENST00000645276	2478120	c.110C>G	p.S37C
CTNNB1_ENST00000645276	2478107	c.101G>A	p.G34E
CTNNB1_ENST00000645276	2478117	c.97T>C	p.S33P
CTNNB1_ENST00000645276	2478147	c.109_110delinsCT	p.S37L
CTNNB1_ENST00000645276	2478138	c.94G>T	p.D32Y
CTNNB1_ENST00000645276	2478136	c.105C>T	p.I35=
CTNNB1_ENST00000645276	2478135	c.95A>T	p.D32V
CTNNB1_ENST00000645276	2478148	c.105C>T	p.I35=
CTNNB1_ENST00000645493	2478126	c.101C>T	p.T34I
CTNNB1_ENST00000645493	2478153	c.73G>A	p.D25N
CTNNB1_ENST00000645493	2478136	c.84C>T	p.I28=
CTNNB1_ENST00000645493	2478107	c.89C>G	p.S30C
CTNNB1_ENST00000645493	2478108	c.89C>G	p.S30C
CTNNB1_ENST00000645493	1449920	c.89C>G	p.S30C
CTNNB1_ENST00000645493	2478101	c.89C>G	p.S30C
CTNNB1_ENST00000645493	2478120	c.89C>G	p.S30C
CTNNB1_ENST00000645493	2478136	c.89C>G	p.S30C
CTNNB1_ENST00000645493	2478141	c.80G>T	p.G27V
CTNNB1_ENST00000645493	2478132	c.89C>T	p.S30F
CTNNB1_ENST00000645493	2478113	c.89C>T	p.S30F
CTNNB1_ENST00000645493	2478130	c.89C>T	p.S30F
CTNNB1_ENST00000645493	2478145	c.80G>T	p.G27V
CTNNB1_ENST00000645493	2478147	c.88_89delinsCT	p.S30L
CTNNB1_ENST00000645493	2478135	c.74A>T	p.D25V
CTNNB1_ENST00000645493	2478140	c.101C>T	p.T34I
CTNNB1_ENST00000645493	2478138	c.73G>T	p.D25Y
CTNNB1_ENST00000645493	2478104	c.77C>G	p.S26C
CTNNB1_ENST00000645493	2478152	c.73G>A	p.D25N
CTNNB1_ENST00000645493	2478148	c.84C>T	p.I28=
CTNNB1_ENST00000645493	2478117	c.76T>C	p.S26P
CTNNB1_ENST00000645493	2478107	c.80G>A	p.G27E
CTNNB1_ENST00000645900	2478126	c.101C>T	p.T34I
CTNNB1_ENST00000645900	2478140	c.101C>T	p.T34I
CTNNB1_ENST00000645900	2478135	c.74A>T	p.D25V
CTNNB1_ENST00000645900	2478138	c.73G>T	p.D25Y
CTNNB1_ENST00000645900	2478117	c.76T>C	p.S26P
CTNNB1_ENST00000645900	2478148	c.84C>T	p.I28=
CTNNB1_ENST00000645900	2478136	c.84C>T	p.I28=
CTNNB1_ENST00000645900	2478153	c.73G>A	p.D25N
CTNNB1_ENST00000645900	2478152	c.73G>A	p.D25N
CTNNB1_ENST00000645900	2478113	c.89C>T	p.S30F
CTNNB1_ENST00000645900	2478132	c.89C>T	p.S30F
CTNNB1_ENST00000645900	2478130	c.89C>T	p.S30F
CTNNB1_ENST00000645900	2478108	c.89C>G	p.S30C
CTNNB1_ENST00000645900	1449920	c.89C>G	p.S30C
CTNNB1_ENST00000645900	2478107	c.89C>G	p.S30C
CTNNB1_ENST00000645900	2478136	c.89C>G	p.S30C
CTNNB1_ENST00000645900	2478101	c.89C>G	p.S30C
CTNNB1_ENST00000645900	2478120	c.89C>G	p.S30C
CTNNB1_ENST00000645900	2478104	c.77C>G	p.S26C
CTNNB1_ENST00000645900	2478107	c.80G>A	p.G27E
CTNNB1_ENST00000645900	2478147	c.88_89delinsCT	p.S30L
CTNNB1_ENST00000645900	2478145	c.80G>T	p.G27V
CTNNB1_ENST00000645900	2478141	c.80G>T	p.G27V
CTNNB1_ENST00000645982	2478148	c.105C>T	p.I35=
CTNNB1_ENST00000645982	2478145	c.101G>T	p.G34V
CTNNB1_ENST00000645982	2478104	c.98C>G	p.S33C
CTNNB1_ENST00000645982	2478153	c.94G>A	p.D32N
CTNNB1_ENST00000645982	2478152	c.94G>A	p.D32N
CTNNB1_ENST00000645982	2478147	c.109_110delinsCT	p.S37L
CTNNB1_ENST00000645982	2478107	c.101G>A	p.G34E
CTNNB1_ENST00000645982	2478126	c.122C>T	p.T41I
CTNNB1_ENST00000645982	2478140	c.122C>T	p.T41I
CTNNB1_ENST00000645982	2478138	c.94G>T	p.D32Y
CTNNB1_ENST00000645982	2478113	c.110C>T	p.S37F
CTNNB1_ENST00000645982	2478130	c.110C>T	p.S37F
CTNNB1_ENST00000645982	2478135	c.95A>T	p.D32V
CTNNB1_ENST00000645982	2478132	c.110C>T	p.S37F
CTNNB1_ENST00000645982	1449920	c.110C>G	p.S37C
CTNNB1_ENST00000645982	2478107	c.110C>G	p.S37C
CTNNB1_ENST00000645982	2478101	c.110C>G	p.S37C
CTNNB1_ENST00000645982	2478120	c.110C>G	p.S37C
CTNNB1_ENST00000645982	2478136	c.110C>G	p.S37C
CTNNB1_ENST00000645982	2478108	c.110C>G	p.S37C
CTNNB1_ENST00000645982	2478141	c.101G>T	p.G34V
CTNNB1_ENST00000645982	2478117	c.97T>C	p.S33P
CTNNB1_ENST00000645982	2478136	c.105C>T	p.I35=
CTNNB1_ENST00000646116	2478117	c.76T>C	p.S26P
CTNNB1_ENST00000646116	2478135	c.74A>T	p.D25V
CTNNB1_ENST00000646116	2478136	c.89C>G	p.S30C
CTNNB1_ENST00000646116	2478107	c.89C>G	p.S30C
CTNNB1_ENST00000646116	2478101	c.89C>G	p.S30C
CTNNB1_ENST00000646116	2478108	c.89C>G	p.S30C
CTNNB1_ENST00000646116	2478141	c.80G>T	p.G27V
CTNNB1_ENST00000646116	2478145	c.80G>T	p.G27V
CTNNB1_ENST00000646116	2478120	c.89C>G	p.S30C
CTNNB1_ENST00000646116	2478130	c.89C>T	p.S30F
CTNNB1_ENST00000646116	2478113	c.89C>T	p.S30F
CTNNB1_ENST00000646116	2478132	c.89C>T	p.S30F
CTNNB1_ENST00000646116	2478104	c.77C>G	p.S26C
CTNNB1_ENST00000646116	2478140	c.101C>T	p.T34I
CTNNB1_ENST00000646116	2478147	c.88_89delinsCT	p.S30L
CTNNB1_ENST00000646116	2478126	c.101C>T	p.T34I
CTNNB1_ENST00000646116	2478152	c.73G>A	p.D25N
CTNNB1_ENST00000646116	2478153	c.73G>A	p.D25N
CTNNB1_ENST00000646116	2478136	c.84C>T	p.I28=
CTNNB1_ENST00000646116	2478107	c.80G>A	p.G27E
CTNNB1_ENST00000646116	2478148	c.84C>T	p.I28=
CTNNB1_ENST00000646116	2478138	c.73G>T	p.D25Y
CTNNB1_ENST00000646116	1449920	c.89C>G	p.S30C
CTNNB1_ENST00000646174	2478117	c.76T>C	p.S26P
CTNNB1_ENST00000646174	2478130	c.89C>T	p.S30F
CTNNB1_ENST00000646174	2478132	c.89C>T	p.S30F
CTNNB1_ENST00000646174	2478113	c.89C>T	p.S30F
CTNNB1_ENST00000646174	2478107	c.80G>A	p.G27E
CTNNB1_ENST00000646174	2478147	c.88_89delinsCT	p.S30L
CTNNB1_ENST00000646174	2478153	c.73G>A	p.D25N
CTNNB1_ENST00000646174	2478141	c.80G>T	p.G27V
CTNNB1_ENST00000646174	2478145	c.80G>T	p.G27V
CTNNB1_ENST00000646174	2478104	c.77C>G	p.S26C
CTNNB1_ENST00000646174	2478126	c.101C>T	p.T34I
CTNNB1_ENST00000646174	2478140	c.101C>T	p.T34I
CTNNB1_ENST00000646174	2478152	c.73G>A	p.D25N
CTNNB1_ENST00000646174	1449920	c.89C>G	p.S30C
CTNNB1_ENST00000646174	2478101	c.89C>G	p.S30C
CTNNB1_ENST00000646174	2478120	c.89C>G	p.S30C
CTNNB1_ENST00000646174	2478108	c.89C>G	p.S30C
CTNNB1_ENST00000646174	2478136	c.89C>G	p.S30C
CTNNB1_ENST00000646174	2478107	c.89C>G	p.S30C
CTNNB1_ENST00000646174	2478138	c.73G>T	p.D25Y
CTNNB1_ENST00000646174	2478135	c.74A>T	p.D25V
CTNNB1_ENST00000646174	2478148	c.84C>T	p.I28=
CTNNB1_ENST00000646174	2478136	c.84C>T	p.I28=
CTNNB1_ENST00000646369	2478126	c.122C>T	p.T41I
CTNNB1_ENST00000646369	2478145	c.101G>T	p.G34V
CTNNB1_ENST00000646369	2478136	c.105C>T	p.I35=
CTNNB1_ENST00000646369	2478130	c.110C>T	p.S37F
CTNNB1_ENST00000646369	2478132	c.110C>T	p.S37F
CTNNB1_ENST00000646369	2478113	c.110C>T	p.S37F
CTNNB1_ENST00000646369	2478107	c.101G>A	p.G34E
CTNNB1_ENST00000646369	2478152	c.94G>A	p.D32N
CTNNB1_ENST00000646369	2478153	c.94G>A	p.D32N
CTNNB1_ENST00000646369	2478148	c.105C>T	p.I35=
CTNNB1_ENST00000646369	2478107	c.110C>G	p.S37C
CTNNB1_ENST00000646369	2478101	c.110C>G	p.S37C
CTNNB1_ENST00000646369	2478120	c.110C>G	p.S37C
CTNNB1_ENST00000646369	2478136	c.110C>G	p.S37C
CTNNB1_ENST00000646369	1449920	c.110C>G	p.S37C
CTNNB1_ENST00000646369	2478108	c.110C>G	p.S37C
CTNNB1_ENST00000646369	2478135	c.95A>T	p.D32V
CTNNB1_ENST00000646369	2478138	c.94G>T	p.D32Y
CTNNB1_ENST00000646369	2478104	c.98C>G	p.S33C
CTNNB1_ENST00000646369	2478117	c.97T>C	p.S33P
CTNNB1_ENST00000646369	2478147	c.109_110delinsCT	p.S37L
CTNNB1_ENST00000646369	2478141	c.101G>T	p.G34V
CTNNB1_ENST00000646369	2478140	c.122C>T	p.T41I
CTNNB1_ENST00000646381	2478132	c.89C>T	p.S30F
CTNNB1_ENST00000646381	2478113	c.89C>T	p.S30F
CTNNB1_ENST00000646381	2478130	c.89C>T	p.S30F
CTNNB1_ENST00000646381	2478138	c.73G>T	p.D25Y
CTNNB1_ENST00000646381	2478145	c.80G>T	p.G27V
CTNNB1_ENST00000646381	2478141	c.80G>T	p.G27V
CTNNB1_ENST00000646381	2478107	c.80G>A	p.G27E
CTNNB1_ENST00000646381	2478135	c.74A>T	p.D25V
CTNNB1_ENST00000646381	2478126	c.101C>T	p.T34I
CTNNB1_ENST00000646381	2478148	c.84C>T	p.I28=
CTNNB1_ENST00000646381	2478153	c.73G>A	p.D25N
CTNNB1_ENST00000646381	2478136	c.84C>T	p.I28=
CTNNB1_ENST00000646381	2478140	c.101C>T	p.T34I
CTNNB1_ENST00000646381	2478152	c.73G>A	p.D25N
CTNNB1_ENST00000646381	2478104	c.77C>G	p.S26C
CTNNB1_ENST00000646381	2478117	c.76T>C	p.S26P
CTNNB1_ENST00000646381	2478147	c.88_89delinsCT	p.S30L
CTNNB1_ENST00000646381	2478101	c.89C>G	p.S30C
CTNNB1_ENST00000646381	2478108	c.89C>G	p.S30C
CTNNB1_ENST00000646381	2478136	c.89C>G	p.S30C
CTNNB1_ENST00000646381	1449920	c.89C>G	p.S30C
CTNNB1_ENST00000646381	2478120	c.89C>G	p.S30C
CTNNB1_ENST00000646381	2478107	c.89C>G	p.S30C
CTNNB1_ENST00000646725	2478148	c.105C>T	p.I35=
CTNNB1_ENST00000646725	2478147	c.109_110delinsCT	p.S37L
CTNNB1_ENST00000646725	2478107	c.101G>A	p.G34E
CTNNB1_ENST00000646725	2478138	c.94G>T	p.D32Y
CTNNB1_ENST00000646725	2478153	c.94G>A	p.D32N
CTNNB1_ENST00000646725	2478152	c.94G>A	p.D32N
CTNNB1_ENST00000646725	2478130	c.110C>T	p.S37F
CTNNB1_ENST00000646725	2478132	c.110C>T	p.S37F
CTNNB1_ENST00000646725	2478113	c.110C>T	p.S37F
CTNNB1_ENST00000646725	2478108	c.110C>G	p.S37C
CTNNB1_ENST00000646725	2478120	c.110C>G	p.S37C
CTNNB1_ENST00000646725	1449920	c.110C>G	p.S37C
CTNNB1_ENST00000646725	2478136	c.110C>G	p.S37C
CTNNB1_ENST00000646725	2478107	c.110C>G	p.S37C
CTNNB1_ENST00000646725	2478101	c.110C>G	p.S37C
CTNNB1_ENST00000646725	2478104	c.98C>G	p.S33C
CTNNB1_ENST00000646725	2478140	c.122C>T	p.T41I
CTNNB1_ENST00000646725	2478126	c.122C>T	p.T41I
CTNNB1_ENST00000646725	2478117	c.97T>C	p.S33P
CTNNB1_ENST00000646725	2478145	c.101G>T	p.G34V
CTNNB1_ENST00000646725	2478141	c.101G>T	p.G34V
CTNNB1_ENST00000646725	2478135	c.95A>T	p.D32V
CTNNB1_ENST00000646725	2478136	c.105C>T	p.I35=
CTNNB1_ENST00000647264	2478113	c.89C>T	p.S30F
CTNNB1_ENST00000647264	2478130	c.89C>T	p.S30F
CTNNB1_ENST00000647264	2478141	c.80G>T	p.G27V
CTNNB1_ENST00000647264	2478148	c.84C>T	p.I28=
CTNNB1_ENST00000647264	2478147	c.88_89delinsCT	p.S30L
CTNNB1_ENST00000647264	2478153	c.73G>A	p.D25N
CTNNB1_ENST00000647264	2478152	c.73G>A	p.D25N
CTNNB1_ENST00000647264	2478145	c.80G>T	p.G27V
CTNNB1_ENST00000647264	2478136	c.84C>T	p.I28=
CTNNB1_ENST00000647264	2478138	c.73G>T	p.D25Y
CTNNB1_ENST00000647264	2478132	c.89C>T	p.S30F
CTNNB1_ENST00000647264	2478140	c.101C>T	p.T34I
CTNNB1_ENST00000647264	2478126	c.101C>T	p.T34I
CTNNB1_ENST00000647264	2478117	c.76T>C	p.S26P
CTNNB1_ENST00000647264	2478101	c.89C>G	p.S30C
CTNNB1_ENST00000647264	2478120	c.89C>G	p.S30C
CTNNB1_ENST00000647264	2478108	c.89C>G	p.S30C
CTNNB1_ENST00000647264	2478107	c.89C>G	p.S30C
CTNNB1_ENST00000647264	2478136	c.89C>G	p.S30C
CTNNB1_ENST00000647264	1449920	c.89C>G	p.S30C
CTNNB1_ENST00000647264	2478135	c.74A>T	p.D25V
CTNNB1_ENST00000647264	2478107	c.80G>A	p.G27E
CTNNB1_ENST00000647264	2478104	c.77C>G	p.S26C
CTNNB1_ENST00000647390	2478107	c.101G>A	p.G34E
CTNNB1_ENST00000647390	2478107	c.110C>G	p.S37C
CTNNB1_ENST00000647390	2478147	c.109_110delinsCT	p.S37L
CTNNB1_ENST00000647390	2478120	c.110C>G	p.S37C
CTNNB1_ENST00000647390	1449920	c.110C>G	p.S37C
CTNNB1_ENST00000647390	2478108	c.110C>G	p.S37C
CTNNB1_ENST00000647390	2478136	c.110C>G	p.S37C
CTNNB1_ENST00000647390	2478101	c.110C>G	p.S37C
CTNNB1_ENST00000647390	2478148	c.105C>T	p.I35=
CTNNB1_ENST00000647390	2478136	c.105C>T	p.I35=
CTNNB1_ENST00000647390	2478153	c.94G>A	p.D32N
CTNNB1_ENST00000647390	2478152	c.94G>A	p.D32N
CTNNB1_ENST00000647390	2478104	c.98C>G	p.S33C
CTNNB1_ENST00000647390	2478141	c.101G>T	p.G34V
CTNNB1_ENST00000647390	2478117	c.97T>C	p.S33P
CTNNB1_ENST00000647390	2478135	c.95A>T	p.D32V
CTNNB1_ENST00000647390	2478138	c.94G>T	p.D32Y
CTNNB1_ENST00000647390	2478113	c.110C>T	p.S37F
CTNNB1_ENST00000647390	2478130	c.110C>T	p.S37F
CTNNB1_ENST00000647390	2478132	c.110C>T	p.S37F
CTNNB1_ENST00000647390	2478126	c.122C>T	p.T41I
CTNNB1_ENST00000647390	2478140	c.122C>T	p.T41I
CTNNB1_ENST00000647390	2478145	c.101G>T	p.G34V
KRAS	1623461	c.34G>T	p.G12C
KRAS_ENST00000311936	1623461	c.34G>T	p.G12C
KRAS_ENST00000556131	1623461	c.34G>T	p.G12C
KRAS_ENST00000557334	1623461	c.34G>T	p.G12C
PIK3CA	2478136	c.1627A>G	p.I543V
PIK3CA	1668618	c.3140A>G	p.H1047R
PIK3CA	2478115	c.1609C>T	p.R537*
PIK3CA	1668616	c.3140A>G	p.H1047R
PIK3CA	1668597	c.3140A>G	p.H1047R
PIK3CA	1668621	c.3140A>G	p.H1047R
PIK3CA	1668606	c.3140A>G	p.H1047R
PIK3CA	1668602	c.3140A>G	p.H1047R
PIK3CA	1668611	c.3140A>G	p.H1047R
PIK3CA	1668619	c.3140A>G	p.H1047R
PIK3CA	2478152	c.3140A>G	p.H1047R
PIK3CA	2478171	c.3140A>G	p.H1047R
PIK3CA	2478190	c.3140A>G	p.H1047R
PIK3CA	1668615	c.3140A>G	p.H1047R
PIK3CA	1668608	c.3140A>G	p.H1047R
PIK3CA	1668613	c.3140A>G	p.H1047R
PIK3CA	1668610	c.3140A>G	p.H1047R
PIK3CA	2478153	c.3140A>G	p.H1047R
PIK3CA	1668596	c.3140A>G	p.H1047R
PIK3CA	2478169	c.3140A>G	p.H1047R
PIK3CA	2478164	c.1638G>A	p.Q546=
PIK3CA_ENST00000643187	1668608	c.*220A>G	p.?
PIK3CA_ENST00000643187	2478169	c.*220A>G	p.?
PIK3CA_ENST00000643187	1668606	c.*220A>G	p.?
PIK3CA_ENST00000643187	2478171	c.*220A>G	p.?
PIK3CA_ENST00000643187	1668621	c.*220A>G	p.?
PIK3CA_ENST00000643187	1668610	c.*220A>G	p.?
PIK3CA_ENST00000643187	1668597	c.*220A>G	p.?
PIK3CA_ENST00000643187	1668596	c.*220A>G	p.?
PIK3CA_ENST00000643187	2478190	c.*220A>G	p.?
PIK3CA_ENST00000643187	2478153	c.*220A>G	p.?
PIK3CA_ENST00000643187	1668618	c.*220A>G	p.?
PIK3CA_ENST00000643187	1668613	c.*220A>G	p.?
PIK3CA_ENST00000643187	2478136	c.1627A>G	p.I543V
PIK3CA_ENST00000643187	2478164	c.1638G>A	p.Q546=
PIK3CA_ENST00000643187	2478115	c.1609C>T	p.R537*
PIK3CA_ENST00000643187	1668602	c.*220A>G	p.?
PIK3CA_ENST00000643187	1668611	c.*220A>G	p.?
PIK3CA_ENST00000643187	1668616	c.*220A>G	p.?
PIK3CA_ENST00000643187	2478152	c.*220A>G	p.?
PIK3CA_ENST00000643187	1668615	c.*220A>G	p.?
PIK3CA_ENST00000643187	1668619	c.*220A>G	p.?
PTEN	2141892	c.476_477insA	p.T160Dfs*20
PTEN	2141891	c.476_477insA	p.T160Dfs*20
PTEN	2141899	c.476_477insA	p.T160Dfs*20
PTEN	2141898	c.476_477insA	p.T160Dfs*20
PTEN	2141893	c.476_477insA	p.T160Dfs*20
PTEN	2141890	c.476_477insA	p.T160Dfs*20
PTEN	2141897	c.476_477insA	p.T160Dfs*20
PTEN	2141900	c.476_477insA	p.T160Dfs*20
PTEN	2141895	c.476_477insA	p.T160Dfs*20
PTEN	2141894	c.476_477insA	p.T160Dfs*20
PTEN	2141901	c.635-9A>C	p.?
PTEN	2141896	c.476_477insA	p.T160Dfs*20
