# Supplementary material for: Genomic mutation features identify distinct BRCA-associated mutation characteristics in endometrioid carcinoma and endometrioid ovarian carcinoma
Source: Aging (Albany NY). 2021 Nov 27;13(22):24686–709. doi: 10.18632/aging.203710 (PMC8660599; doi:10.18632/aging.203710)
Supplement: Supplementary Table 4 [file aging-13-203710-s005.xlsx]

## Sheet: Sheet1
Supplementary Table 4. Molecular and clinical characteristics of endometrioid carcinoma grouped according to whether 275 genes are mutated or not.
Clinical Attribute	Attribute Type	Statistical Test	p-Value	q-Value
MAF Data	Sample	Chi-squared Test	0	0
Cancer Type	Sample	Chi-squared Test	0	0
Data Core Sample	Sample	Chi-squared Test	0	0
In PanCan Pathway Analysis	Patient	Chi-squared Test	0	0
Fraction Genome Altered	Sample	Kruskal Wallis Test	5.04e-12	1.48e-10
Oncotree Code	Sample	Chi-squared Test	7.79e-11	1.64e-09
Cancer Type Detailed	Sample	Chi-squared Test	7.79e-11	1.64e-09
Tissue Prospective Collection Indicator	Patient	Chi-squared Test	2.53e-10	4.65e-09
Tissue Retrospective Collection Indicator	Patient	Chi-squared Test	4.96e-10	8.1e-09
Year Cancer Initial Diagnosis	Patient	Kruskal Wallis Test	2.79e-09	4.11e-08
RNA-SEQ Data	Sample	Chi-squared Test	9.17e-09	1.23e-07
New Neoplasm Event Post Initial Therapy Indicator	Patient	Chi-squared Test	1.78e-08	2.18e-07
Neoplasm Histologic Type Name	Patient	Chi-squared Test	9.93e-08	1.06e-06
Neoplasm Histologic Grade	Patient	Chi-squared Test	1.08e-07	1.06e-06
Neoplasm Histologic Grade	Sample	Chi-squared Test	1.08e-07	1.06e-06
4q Status	Sample	Chi-squared Test	1.613e-06	1.482e-05
Tissue Source Site	Patient	Chi-squared Test	4.322e-06	3.53e-05
Tissue Source Site	Sample	Chi-squared Test	4.322e-06	3.53e-05
American Joint Committee on Cancer Publication Version Type	Patient	Chi-squared Test	5.588e-06	4.324e-05
Tumor Disease Anatomic Site	Sample	Chi-squared Test	2.009e-05	0.0001477
Form completion date	Patient	Chi-squared Test	3.283e-05	0.0002298
CNA Cluster K4	Sample	Chi-squared Test	0.0001033	0.0006902
Days to Sample Collection.	Sample	Kruskal Wallis Test	0.0001217	0.0007777
Methylation Cluster	Sample	Chi-squared Test	0.0001612	0.0009873
International Classification of Diseases for Oncology, Third Edition ICD-O-3 Histology Code	Patient	Chi-squared Test	0.0007305	0.004295
MSI Status 5 Marker Call	Sample	Chi-squared Test	0.001285	0.007265
MSI Status 7 Marker Call	Sample	Chi-squared Test	0.002937	0.016
3q Status	Sample	Chi-squared Test	0.003312	0.0174
Overall Survival (Months)	Patient	Kruskal Wallis Test	0.005406	0.0274
ICD-10 Classification	Patient	Chi-squared Test	0.00599	0.0284
International Classification of Diseases for Oncology, Third Edition ICD-O-3 Site Code	Patient	Chi-squared Test	0.00599	0.0284
Mutation Count	Sample	Kruskal Wallis Test	0.007281	0.0334
POLE ultra-mutated	Patient	Chi-squared Test	0.007738	0.0345
Tumor Other Histologic Subtype	Patient	Chi-squared Test	0.0095	0.0411
Disease Free (Months)	Patient	Kruskal Wallis Test	0.0104	0.0438
Neoplasm American Joint Committee on Cancer Clinical Group Stage	Patient	Chi-squared Test	0.0202	0.0825
Diagnosis Age	Patient	Kruskal Wallis Test	0.0221	0.0877
Oct embedded	Sample	Chi-squared Test	0.0244	0.0942
Peritoneal washing	Patient	Chi-squared Test	0.0302	0.114
Lymph nodes aortic pos total	Patient	Kruskal Wallis Test	0.0342	0.126
Surgical Margin Resection Status	Patient	Chi-squared Test	0.0394	0.141
Race Category	Patient	Chi-squared Test	0.0512	0.179
Overall Survival Status	Patient	Chi-squared Test	0.0931	0.313
Lymph nodes pelvic pos total	Patient	Kruskal Wallis Test	0.0937	0.313
Surgical approach at diagnosis	Patient	Chi-squared Test	0.0976	0.319
Patient's Vital Status	Patient	Chi-squared Test	0.106	0.339
First-Line Therapy PFS	Patient	Kruskal Wallis Test	0.111	0.346
First Pathologic Diagnosis Biospecimen Acquisition Method Type	Patient	Chi-squared Test	0.133	0.407
MRNA Expression Cluster	Sample	Chi-squared Test	0.136	0.409
Person Neoplasm Status	Patient	Chi-squared Test	0.141	0.415
20p Status	Sample	Chi-squared Test	0.152	0.425
Center of sequencing	Patient	Chi-squared Test	0.153	0.425
Ragnum Hypoxia Score	Patient	Kruskal Wallis Test	0.156	0.425
MLH1 Silencing	Sample	Chi-squared Test	0.156	0.425
Primary Therapy Outcome Success Type	Patient	Chi-squared Test	0.177	0.474
MSI Status	Sample	Chi-squared Test	0.181	0.476
Adjuvant Postoperative Pharmaceutical Therapy Administered Indicator	Patient	Chi-squared Test	0.214	0.553
5p Status	Sample	Chi-squared Test	0.254	0.637
MicroRNA Score	Sample	Kruskal Wallis Test	0.256	0.637
18q Status	Sample	Chi-squared Test	0.271	0.664
First Pathologic Diagnosis Biospecimen Acquisition Other Method Type	Patient	Chi-squared Test	0.323	0.766
Lymph nodes aortic examined count	Patient	Kruskal Wallis Test	0.33	0.766
Lymph nodes aortic pos by he	Patient	Kruskal Wallis Test	0.331	0.766
12p Status	Sample	Chi-squared Test	0.333	0.766
Lymph nodes pelvic pos by he	Patient	Kruskal Wallis Test	0.346	0.782
12q Status	Sample	Chi-squared Test	0.359	0.789
Lymph nodes pelvic pos by ihc	Patient	Kruskal Wallis Test	0.361	0.789
Sample Type	Sample	Chi-squared Test	0.368	0.789
SCNA Cluster	Sample	Chi-squared Test	0.37	0.789
Tumor invasion percent	Patient	Kruskal Wallis Test	0.387	0.813
19q Status	Sample	Chi-squared Test	0.397	0.822
Progression Status	Patient	Chi-squared Test	0.419	0.851
Aneuploidy Score	Sample	Kruskal Wallis Test	0.427	0.851
MicroRNA Cluster	Sample	Chi-squared Test	0.433	0.851
Disease Free Status	Patient	Chi-squared Test	0.434	0.851
Other Sample ID	Sample	Chi-squared Test	0.48	0.874
Pathology Report File Name	Sample	Chi-squared Test	0.48	0.874
Pathology report uuid	Sample	Chi-squared Test	0.48	0.874
Tumor Stage 2009	Sample	Chi-squared Test	0.48	0.874
Sample Initial Weight	Sample	Kruskal Wallis Test	0.482	0.874
1q Status	Sample	Chi-squared Test	0.482	0.874
7p Status	Sample	Chi-squared Test	0.518	0.927
22 (22q) Status	Sample	Chi-squared Test	0.524	0.927
Pregnancies full term count	Patient	Chi-squared Test	0.53	0.927
13 (13q) Status	Sample	Chi-squared Test	0.549	0.949
5q Status	Sample	Chi-squared Test	0.598	0.968
8p Status	Sample	Chi-squared Test	0.61	0.968
6p Status	Sample	Chi-squared Test	0.615	0.968
11q Status	Sample	Chi-squared Test	0.618	0.968
21 (21q) Status	Sample	Chi-squared Test	0.625	0.968
Tumor Tissue Site	Patient	Chi-squared Test	0.626	0.968
Sample type id	Sample	Chi-squared Test	0.626	0.968
Lymph nodes aortic pos by ihc	Patient	Kruskal Wallis Test	0.628	0.968
17q Status	Sample	Chi-squared Test	0.629	0.968
14 (14q) Status	Sample	Chi-squared Test	0.639	0.968
7q Status	Sample	Chi-squared Test	0.644	0.968
3p Status	Sample	Chi-squared Test	0.653	0.968
Person Neoplasm Cancer Status	Patient	Chi-squared Test	0.655	0.968
6q Status	Sample	Chi-squared Test	0.657	0.968
19p Status	Sample	Chi-squared Test	0.662	0.968
Hypertension diagnosis	Patient	Chi-squared Test	0.671	0.968
18p Status	Sample	Chi-squared Test	0.679	0.968
16p Status	Sample	Chi-squared Test	0.682	0.968
2q Status	Sample	Chi-squared Test	0.685	0.968
Patient Height	Patient	Kruskal Wallis Test	0.698	0.977
Lymph nodes pelvic examined count	Patient	Kruskal Wallis Test	0.74	0.991
Disease-specific Survival status	Patient	Chi-squared Test	0.742	0.991
9p Status	Sample	Chi-squared Test	0.749	0.991
16q Status	Sample	Chi-squared Test	0.752	0.991
Did patient start adjuvant postoperative radiotherapy?	Patient	Chi-squared Test	0.759	0.991
9q Status	Sample	Chi-squared Test	0.76	0.991
CNA Data	Sample	Chi-squared Test	0.764	0.991
Tumor Type	Sample	Chi-squared Test	0.772	0.991
Subtype	Patient	Chi-squared Test	0.776	0.991
MMR-D by IHC	Sample	Chi-squared Test	0.781	0.991
10q Status	Sample	Chi-squared Test	0.801	0.991
8q Status	Sample	Chi-squared Test	0.805	0.991
1p Status	Sample	Chi-squared Test	0.81	0.991
Other Patient ID	Patient	Chi-squared Test	0.815	0.991
Buffa Hypoxia Score	Patient	Kruskal Wallis Test	0.837	0.991
Winter Hypoxia Score	Patient	Kruskal Wallis Test	0.837	0.991
Participant Personal Medical History Diabetes Mellitus Ind-3	Patient	Chi-squared Test	0.837	0.991
Menopause Status	Patient	Chi-squared Test	0.853	0.991
Vial number	Sample	Chi-squared Test	0.871	0.991
17p Status	Sample	Chi-squared Test	0.88	0.991
Months of disease-specific survival	Patient	Kruskal Wallis Test	0.885	0.991
4p Status	Sample	Chi-squared Test	0.899	0.991
10p Status	Sample	Chi-squared Test	0.899	0.991
11p Status	Sample	Chi-squared Test	0.901	0.991
Number of Samples Per Patient	Patient	Chi-squared Test	0.901	0.991
Prior Diagnosis	Patient	Chi-squared Test	0.903	0.991
History menopausal hormone therapy	Patient	Chi-squared Test	0.916	0.991
Last Communication Contact from Initial Pathologic Diagnosis Date	Patient	Kruskal Wallis Test	0.917	0.991
Progress Free Survival (Months)	Patient	Kruskal Wallis Test	0.918	0.991
Prior Cancer Diagnosis Occurence	Patient	Chi-squared Test	0.921	0.991
Radiation Therapy	Patient	Chi-squared Test	0.926	0.991
Neoadjuvant Therapy Type Administered Prior To Resection Text	Patient	Chi-squared Test	0.933	0.991
20q Status	Sample	Chi-squared Test	0.943	0.991
Progression Free Status	Patient	Chi-squared Test	0.946	0.991
Tissue Retrospective Collection Indicator	Sample	Chi-squared Test	0.947	0.991
2p Status	Sample	Chi-squared Test	0.956	0.991
Tissue Prospective Collection Indicator	Sample	Chi-squared Test	0.957	0.991
15 (15q) Status	Sample	Chi-squared Test	0.967	0.993
Patient Weight	Patient	Kruskal Wallis Test	0.974	0.993
Ethnicity Category	Patient	Chi-squared Test	0.979	0.993
History hormonal contraceptives use	Patient	Chi-squared Test	1	1
History colorectal cancer	Patient	Chi-squared Test	1	1
